# Supplementary material for: Asymmetric Diels–Alder reaction of 3-(acyloxy)acryloyl oxazolidinones: optically active synthesis of a high-affinity ligand for potent HIV-1 protease inhibitors
Source: Royal Society of Chemistry journal article supplement (doi:10.1039/c9ra10178k), 2019-01-01

*Electronic Supplementary Information (ESI)*

**Asymmetric Diels-Alder Reaction of 3-(Acyloxy)acryloyl  
Oxazolidinones: Optically Active Synthesis of a High-Affinity Ligand for  
Potent HIV-1 Protease Inhibitors**

Arun K. Ghosh\*, Alessandro Grillo, Satish Kovala, and Margherita Brindisi

*Department of Chemistry; Department of Medicinal Chemistry and Molecular pharmacology,  
Purdue University, 560 Oval Drive, West Lafayette, Indiana 47907*

akghosh@purdue.edu

**Contents:**

<sup>1</sup>H-NMR and <sup>13</sup>C-NMR Spectra.....S2-S21

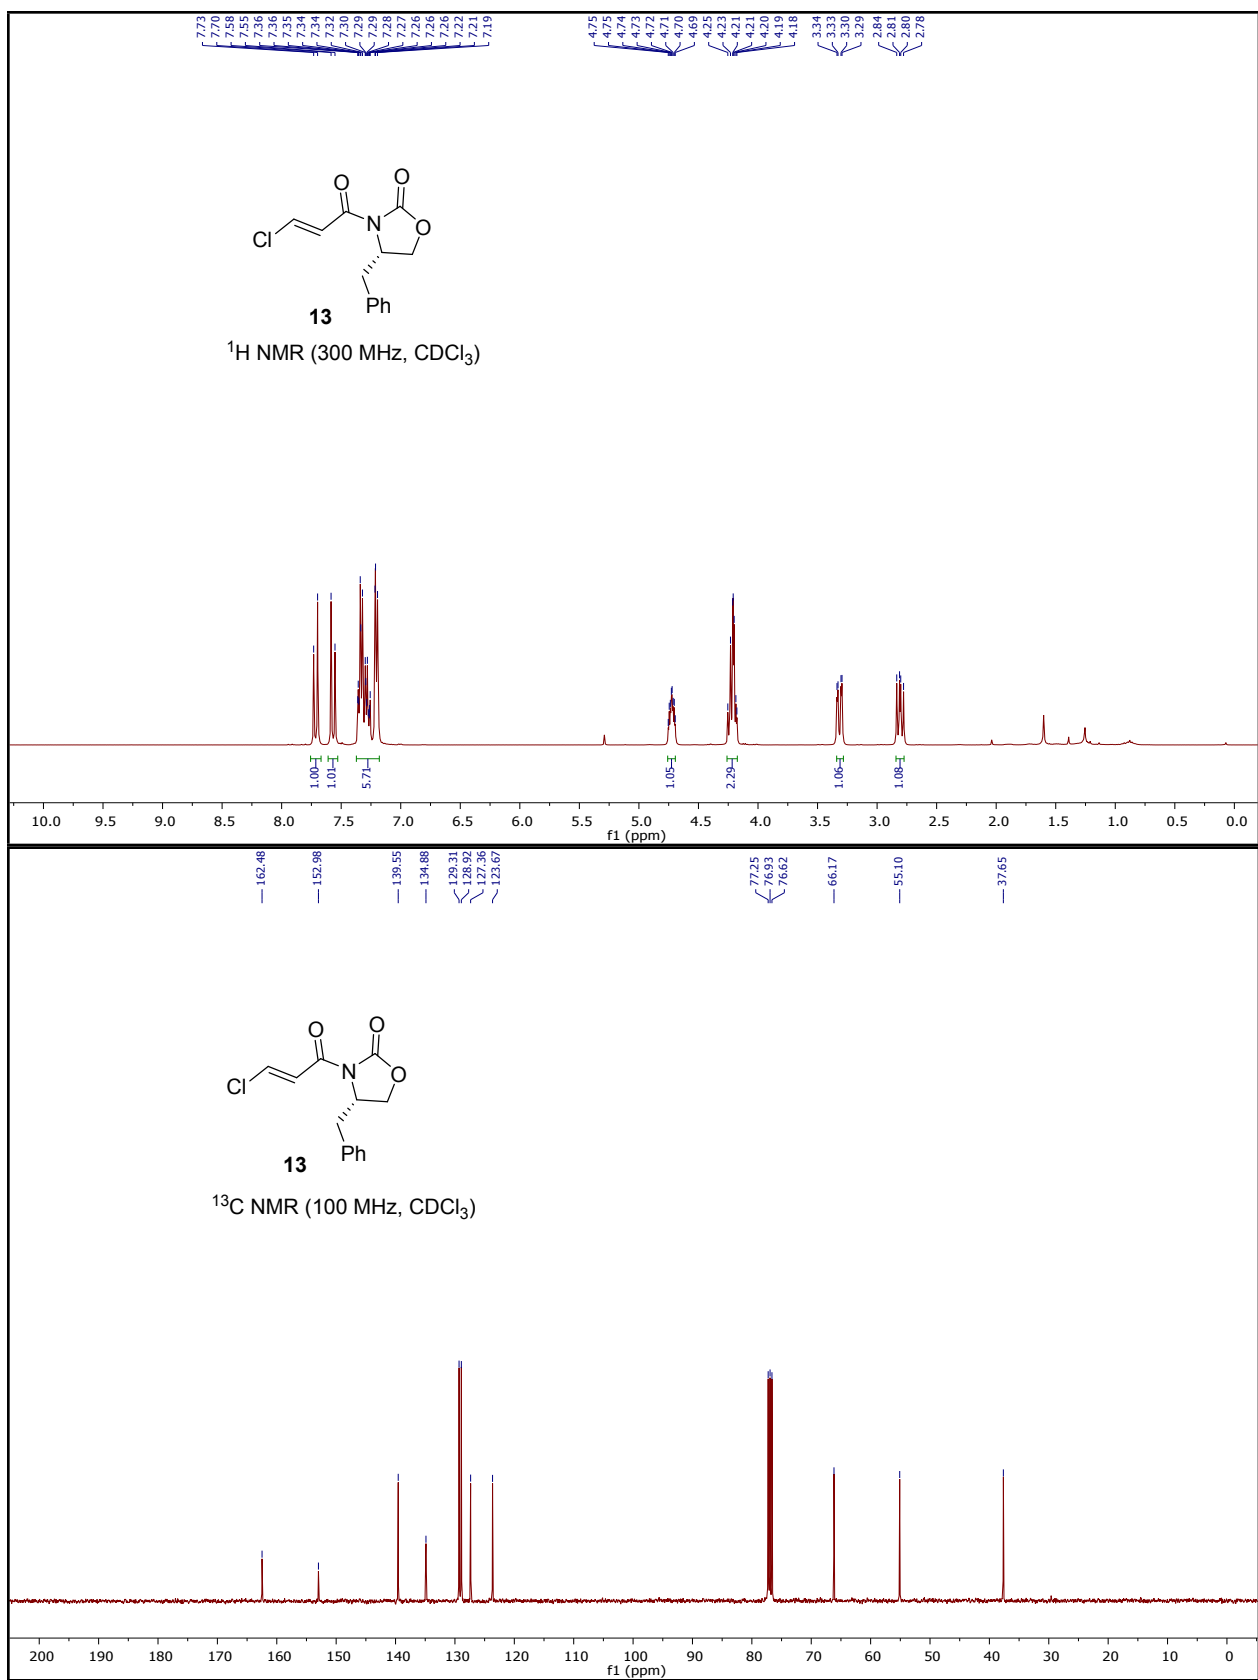

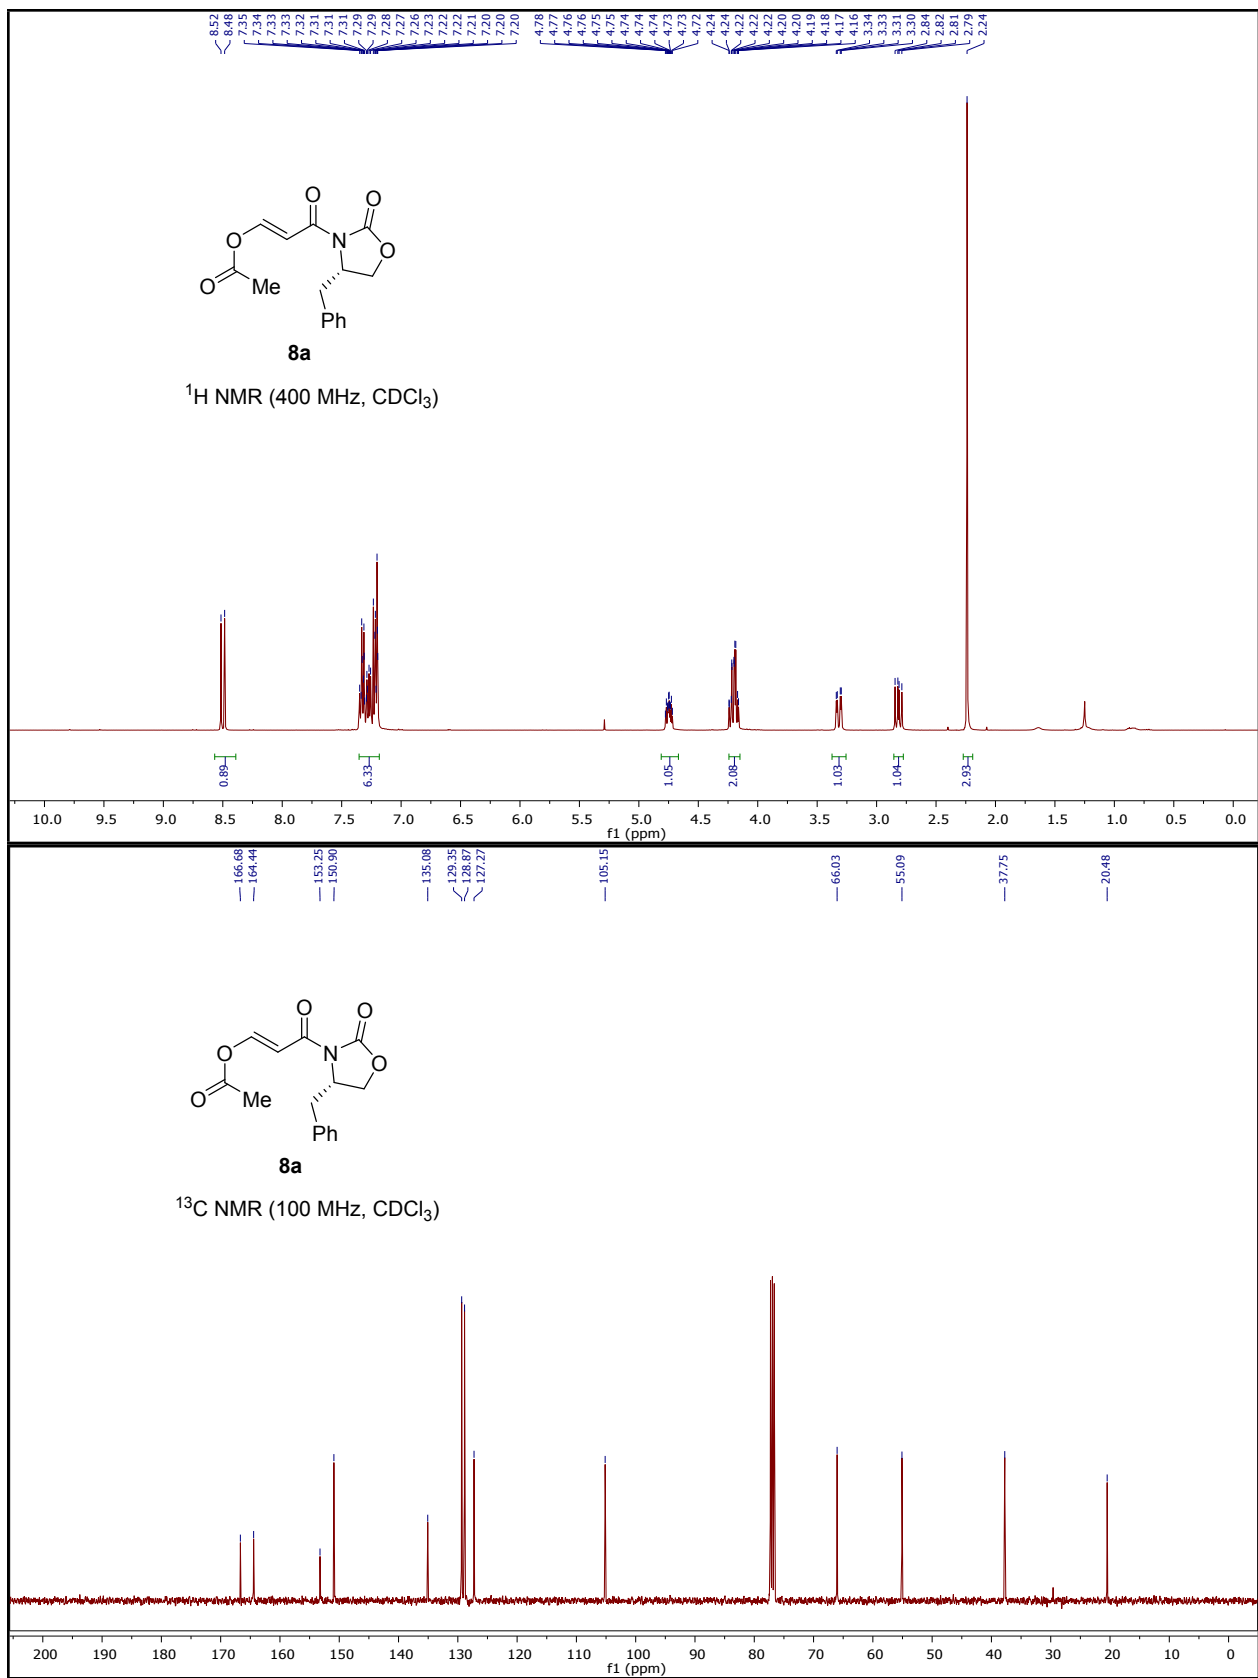

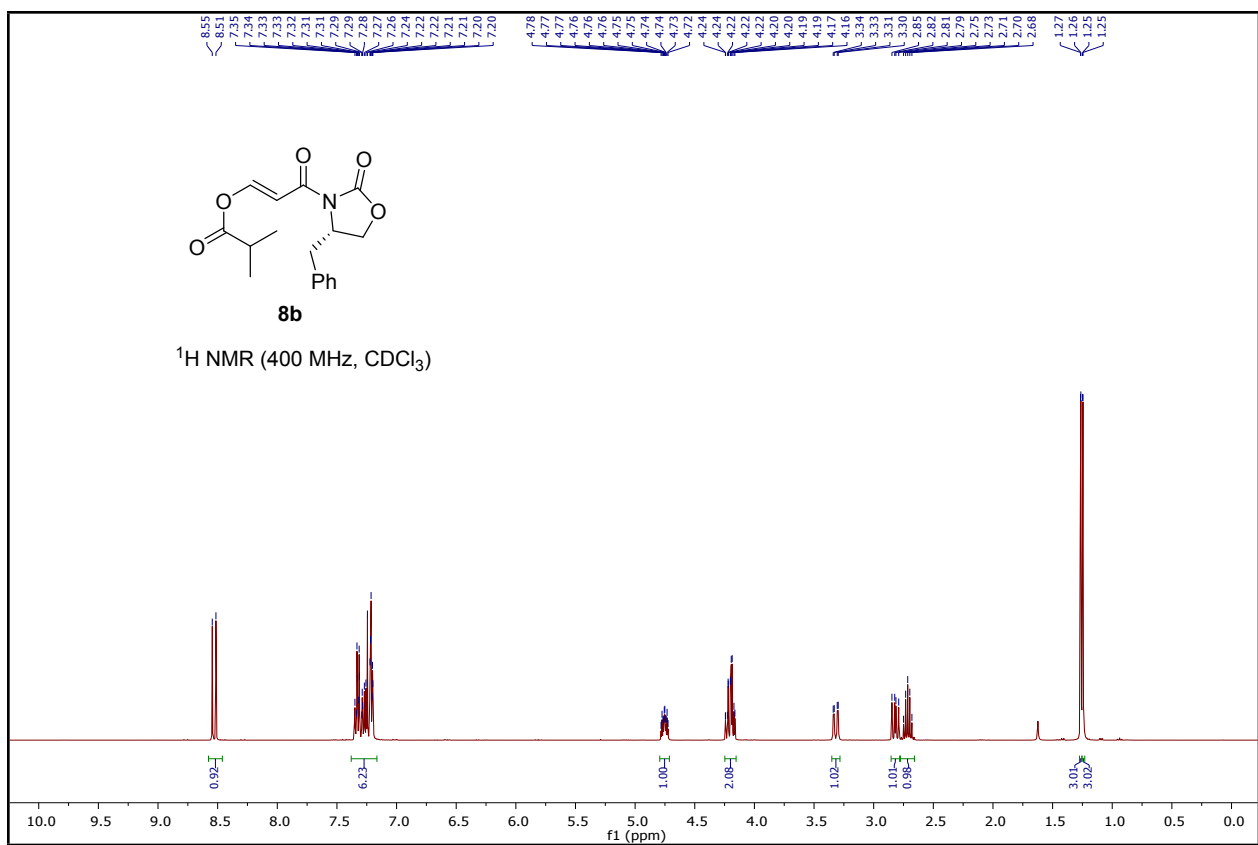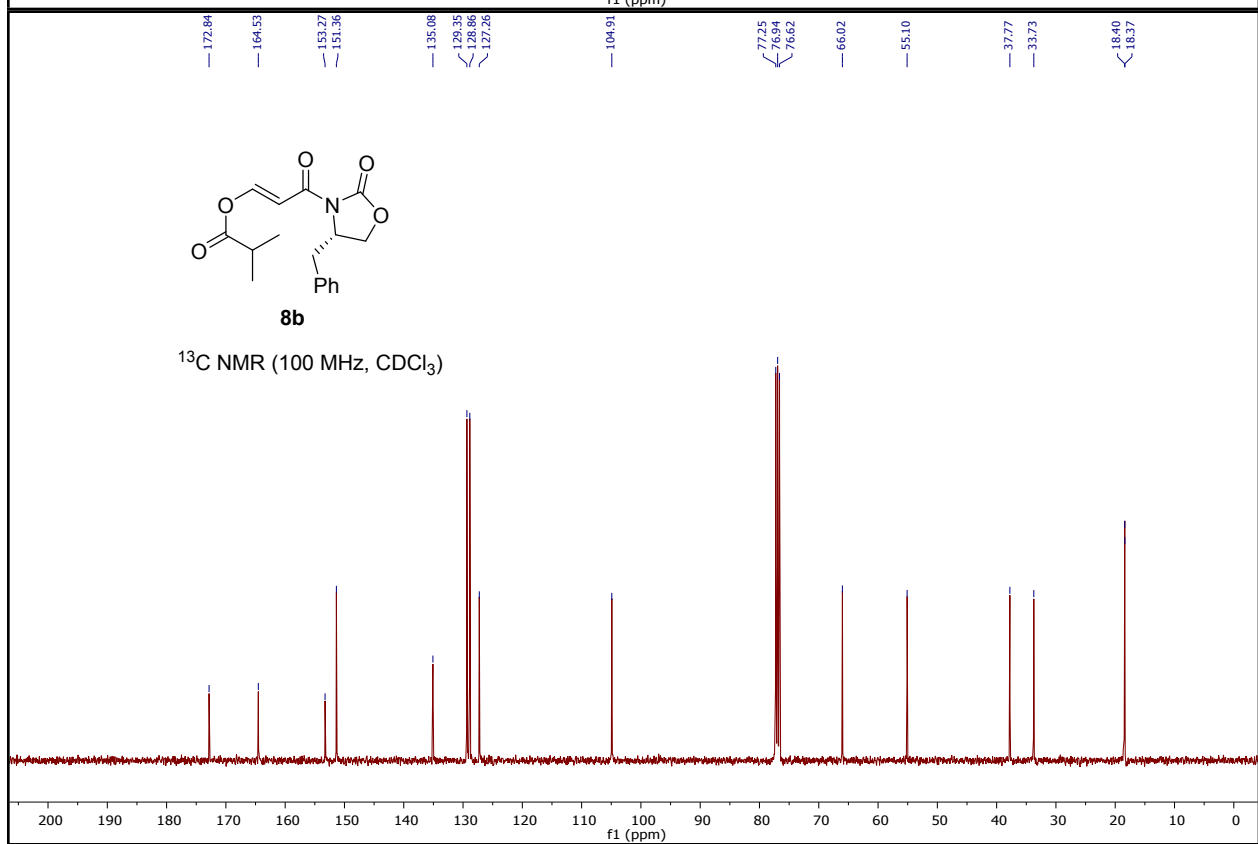

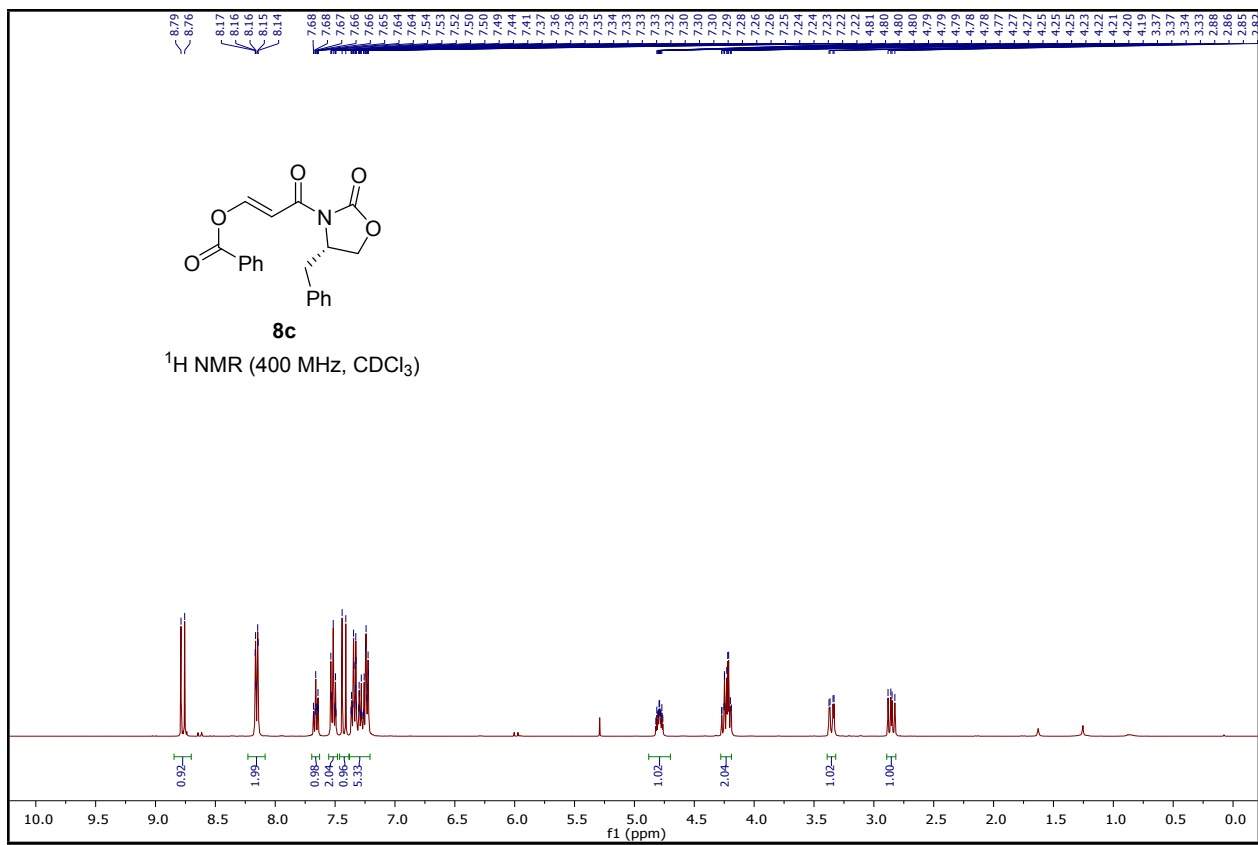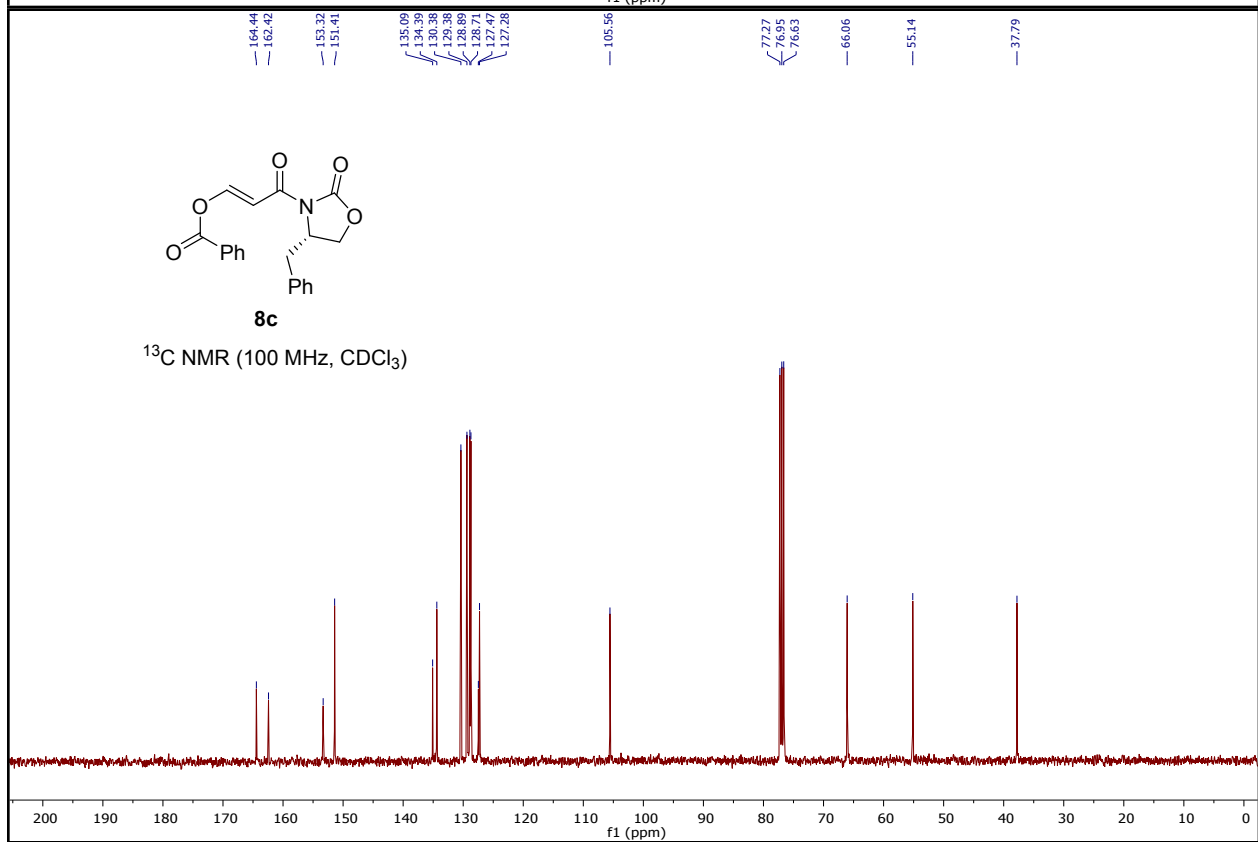

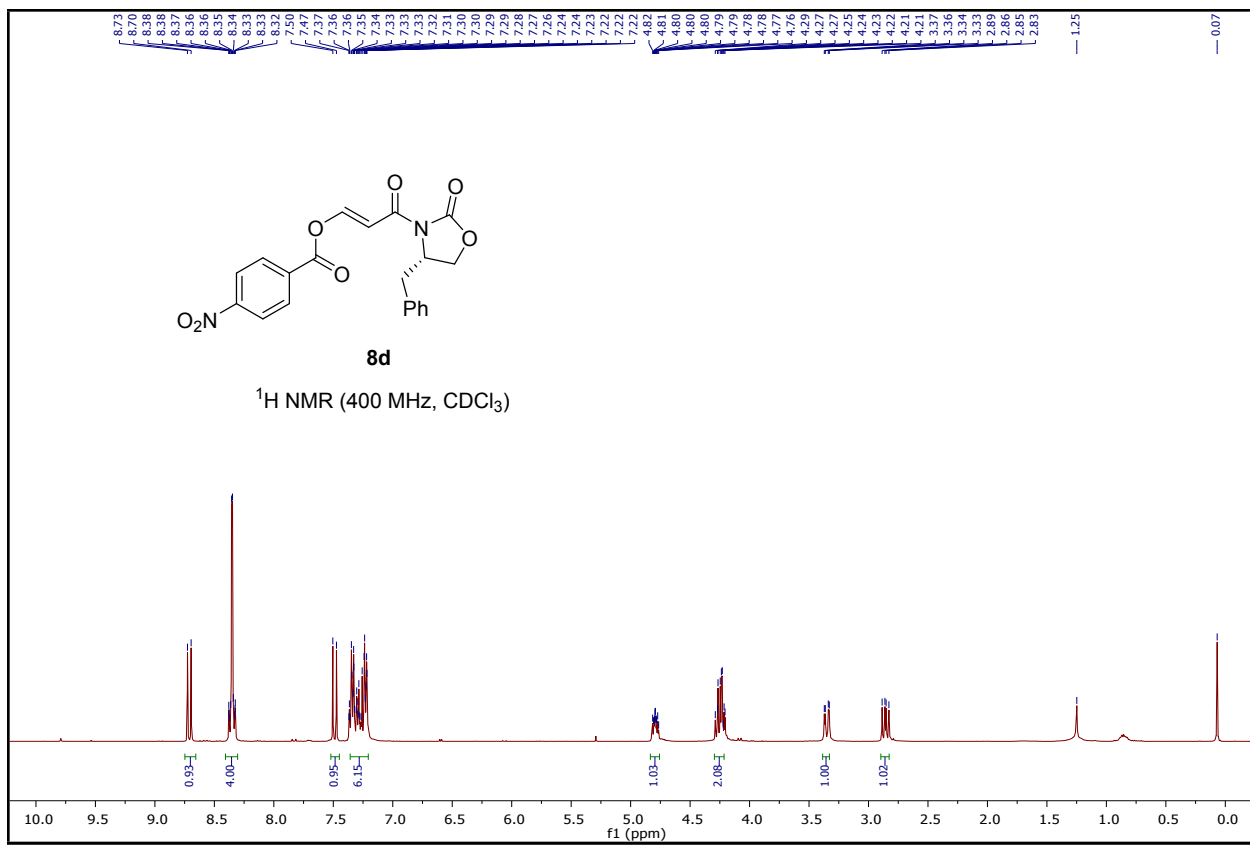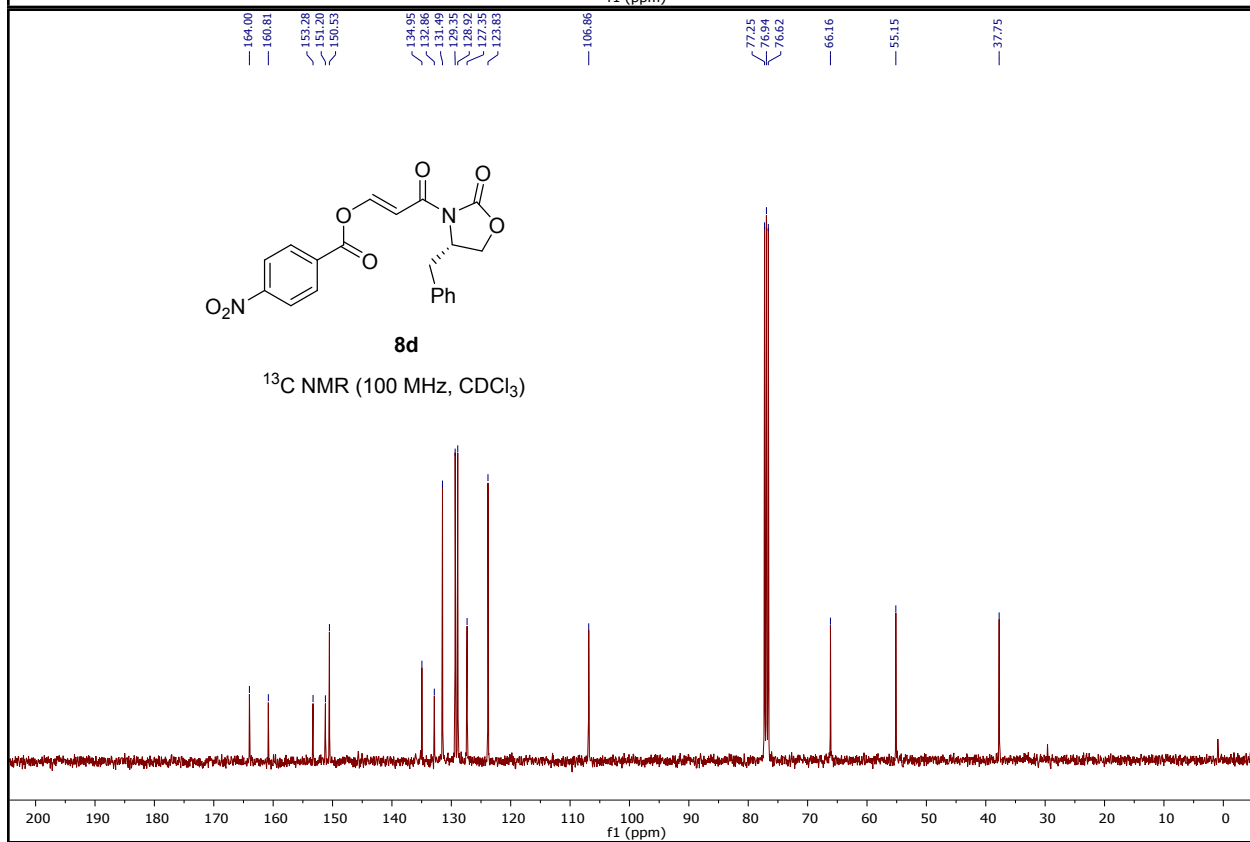

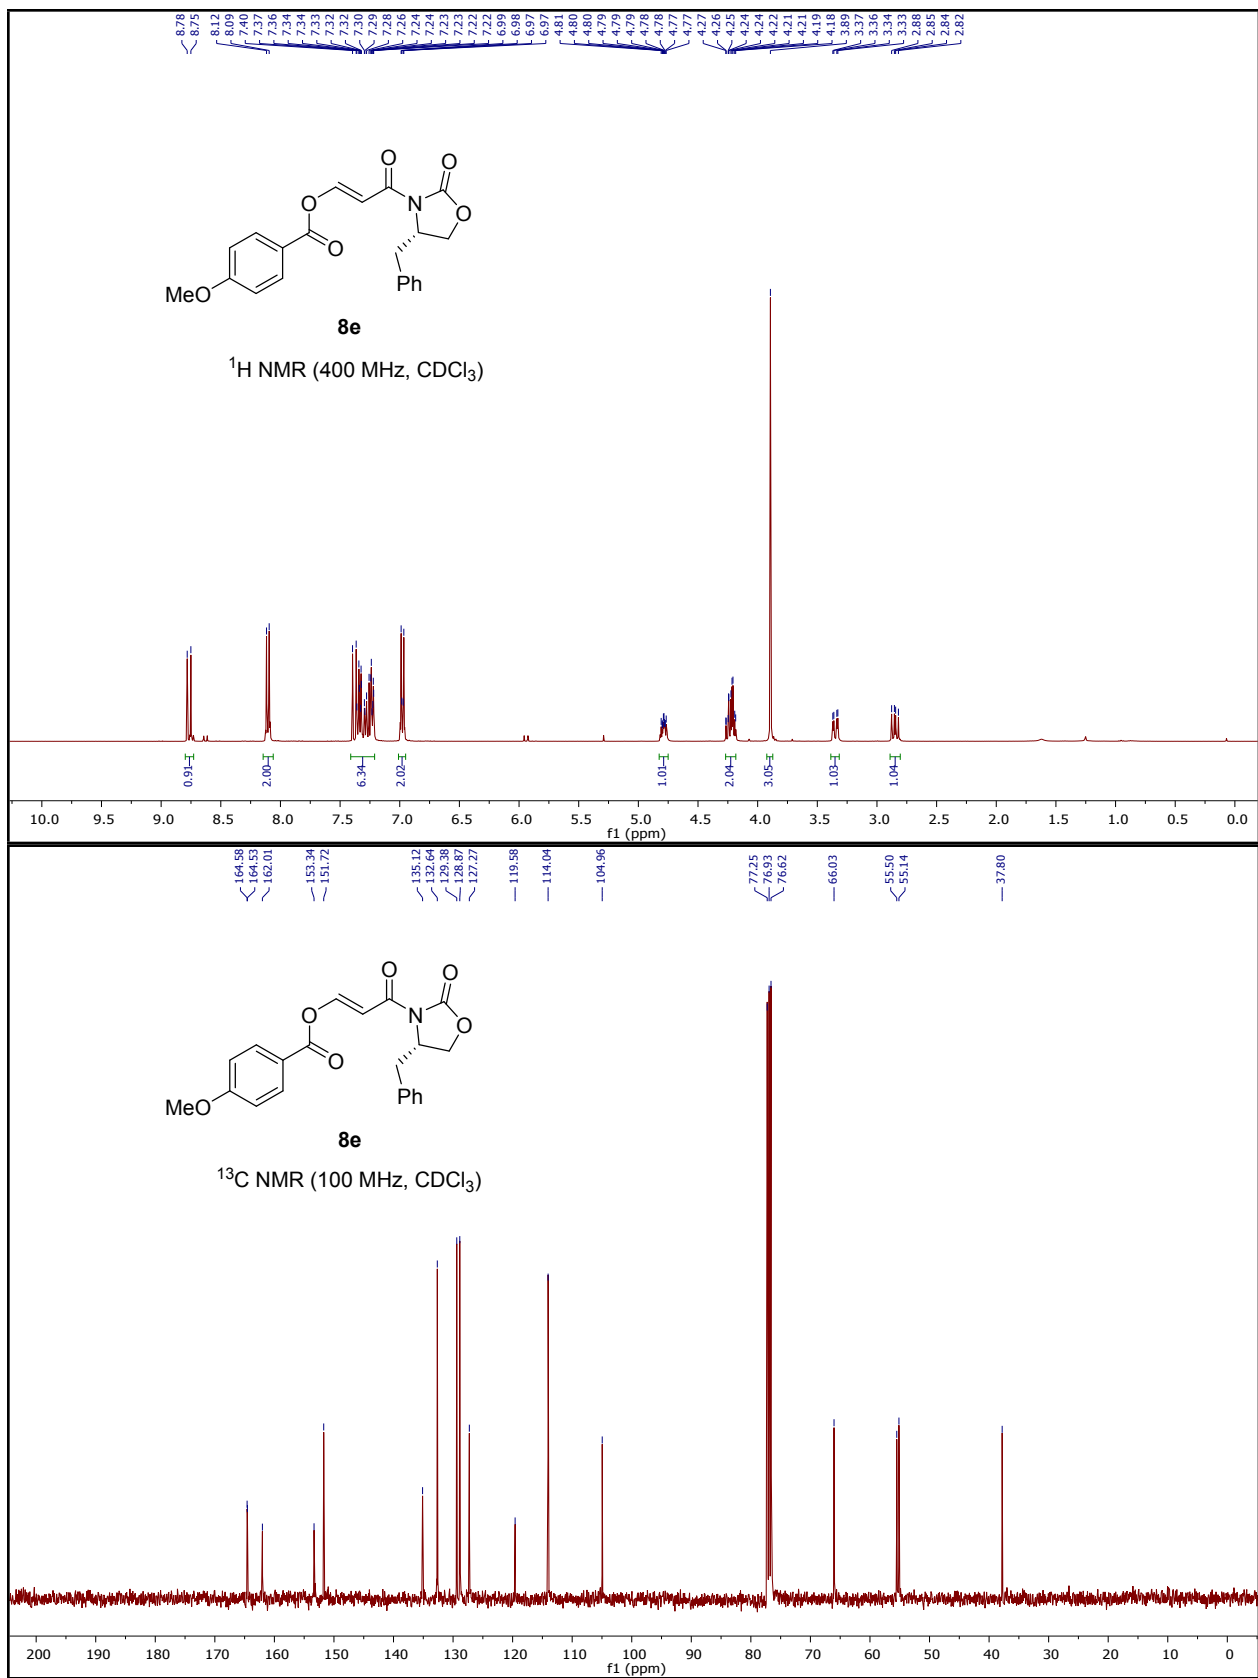

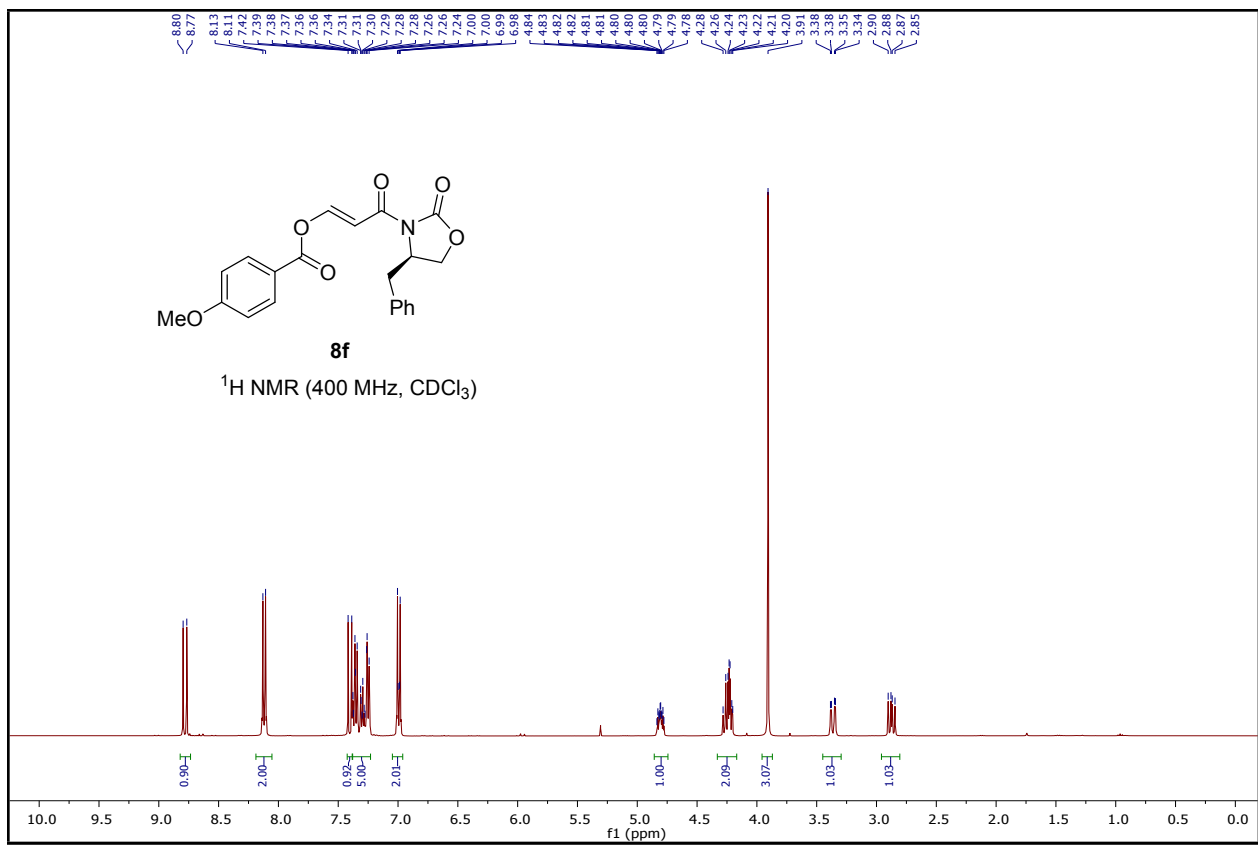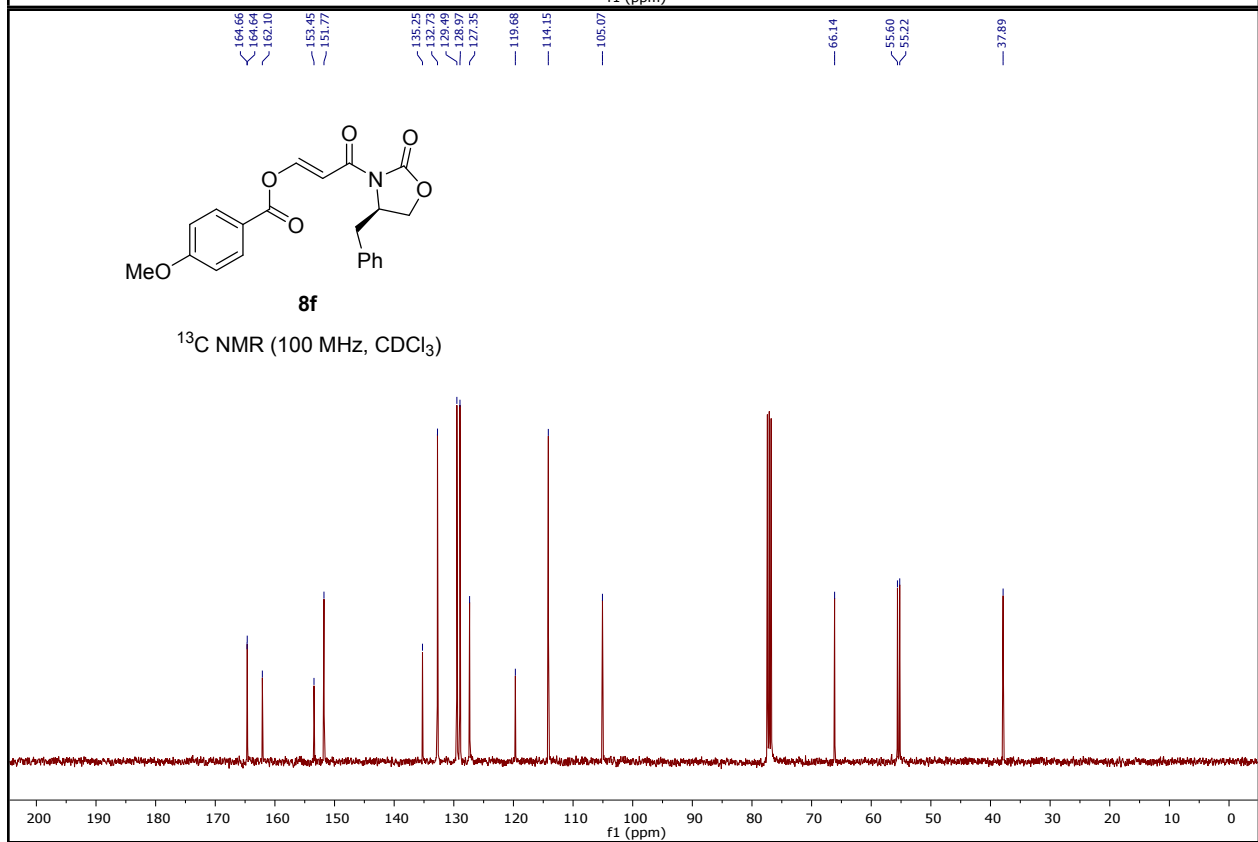



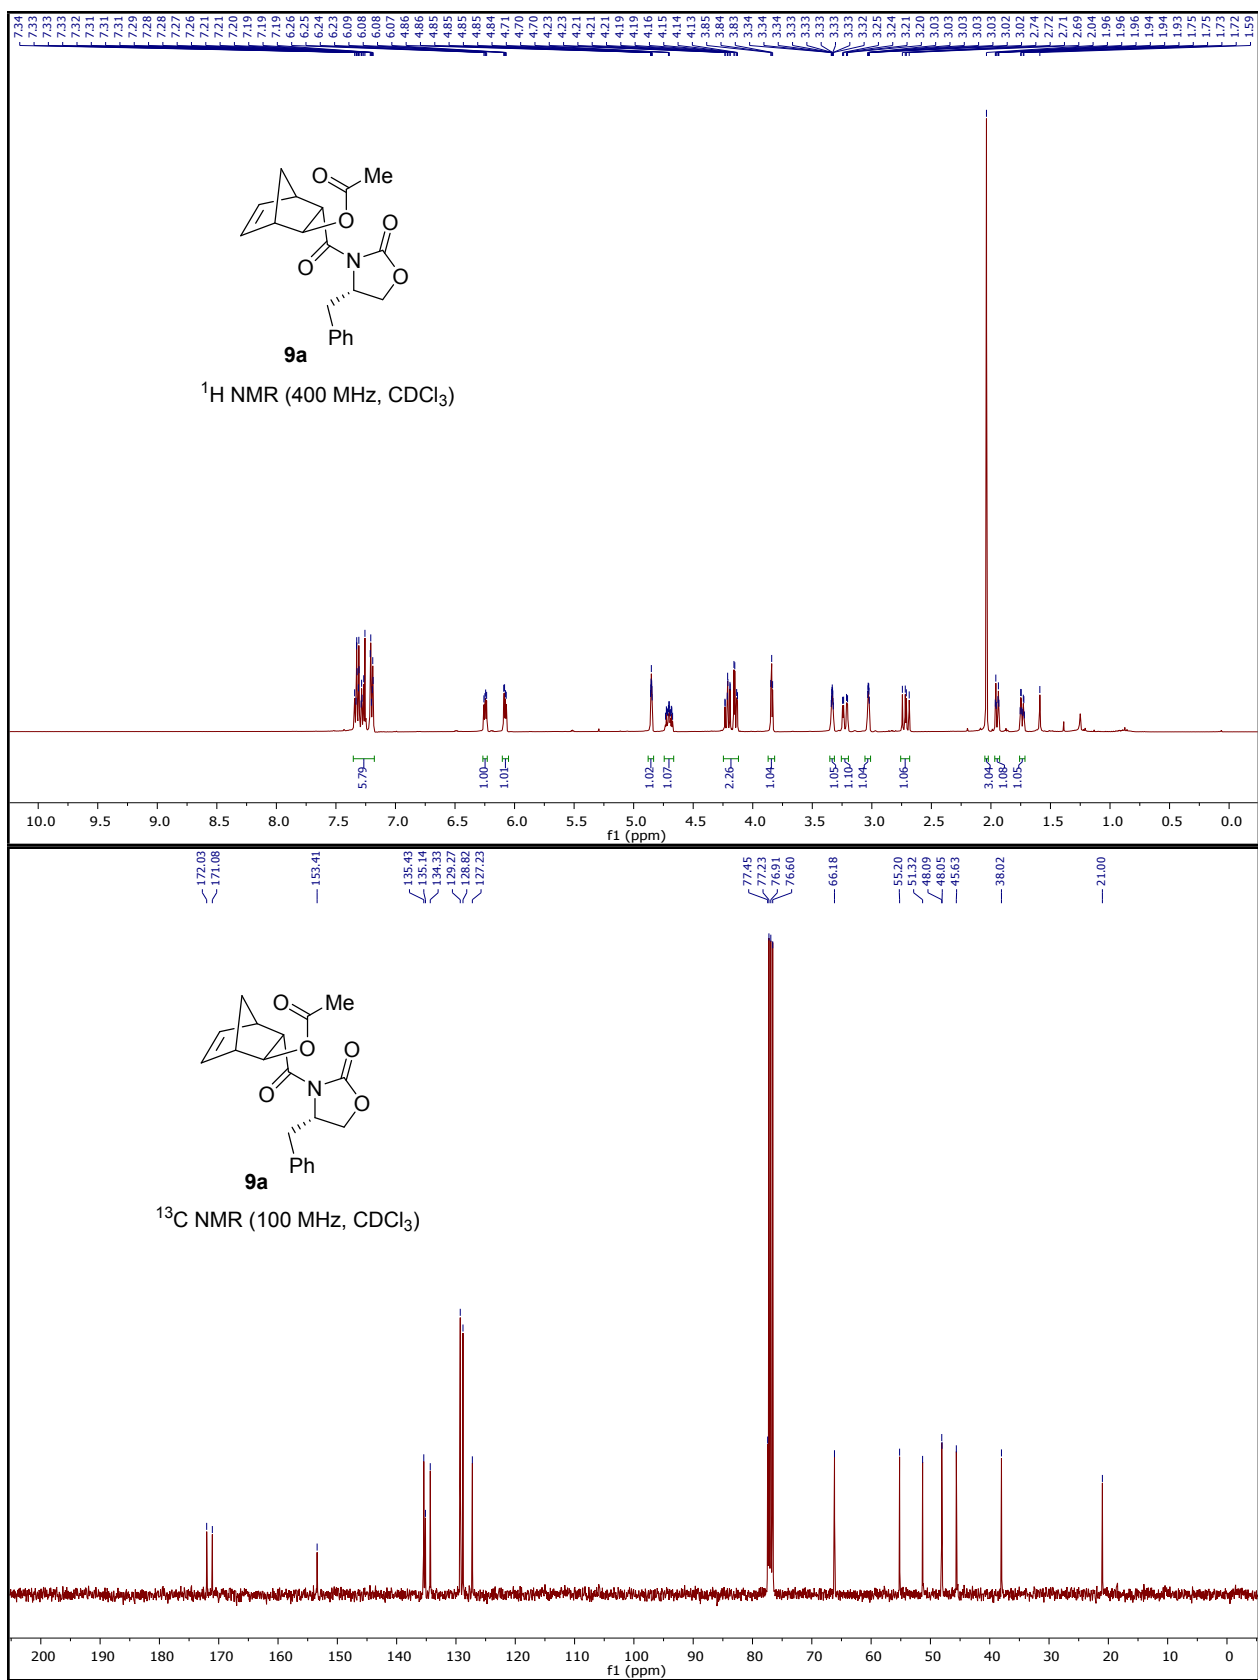

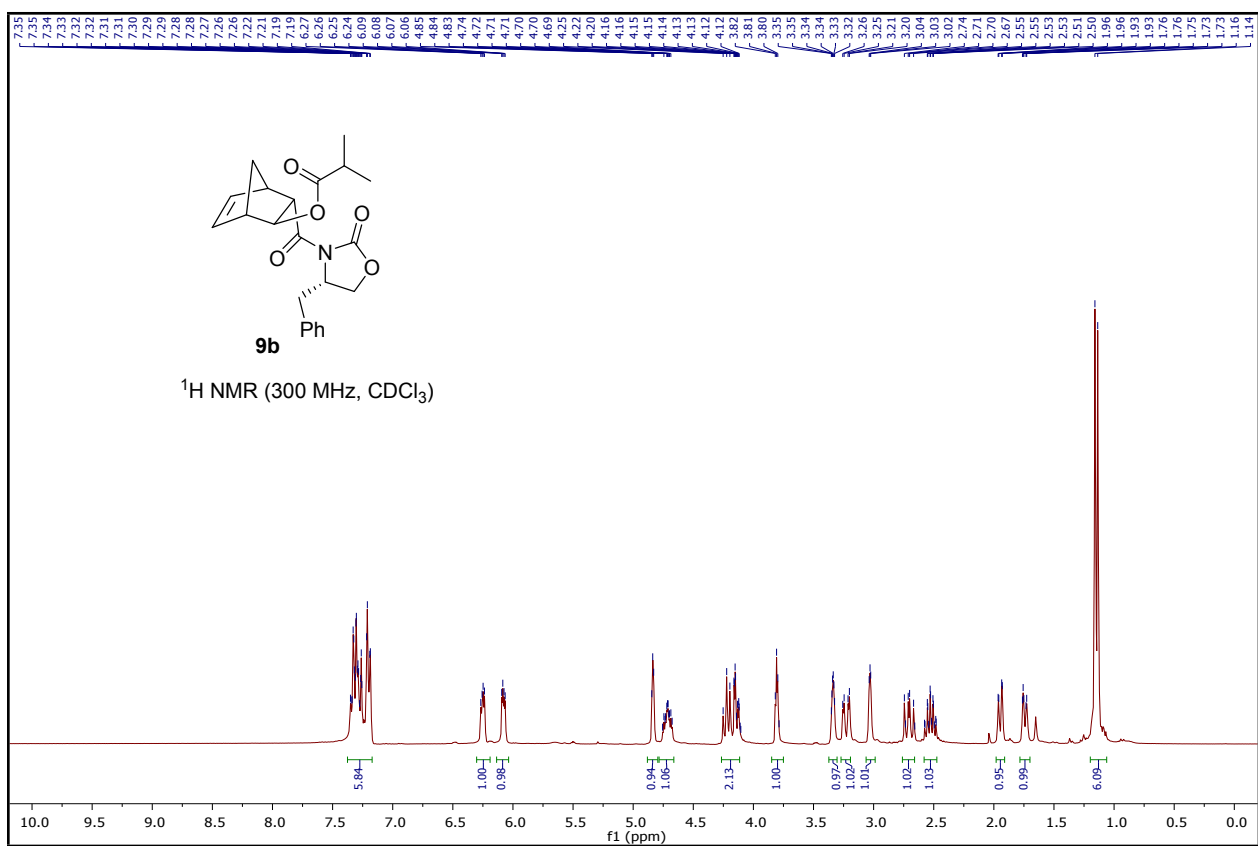

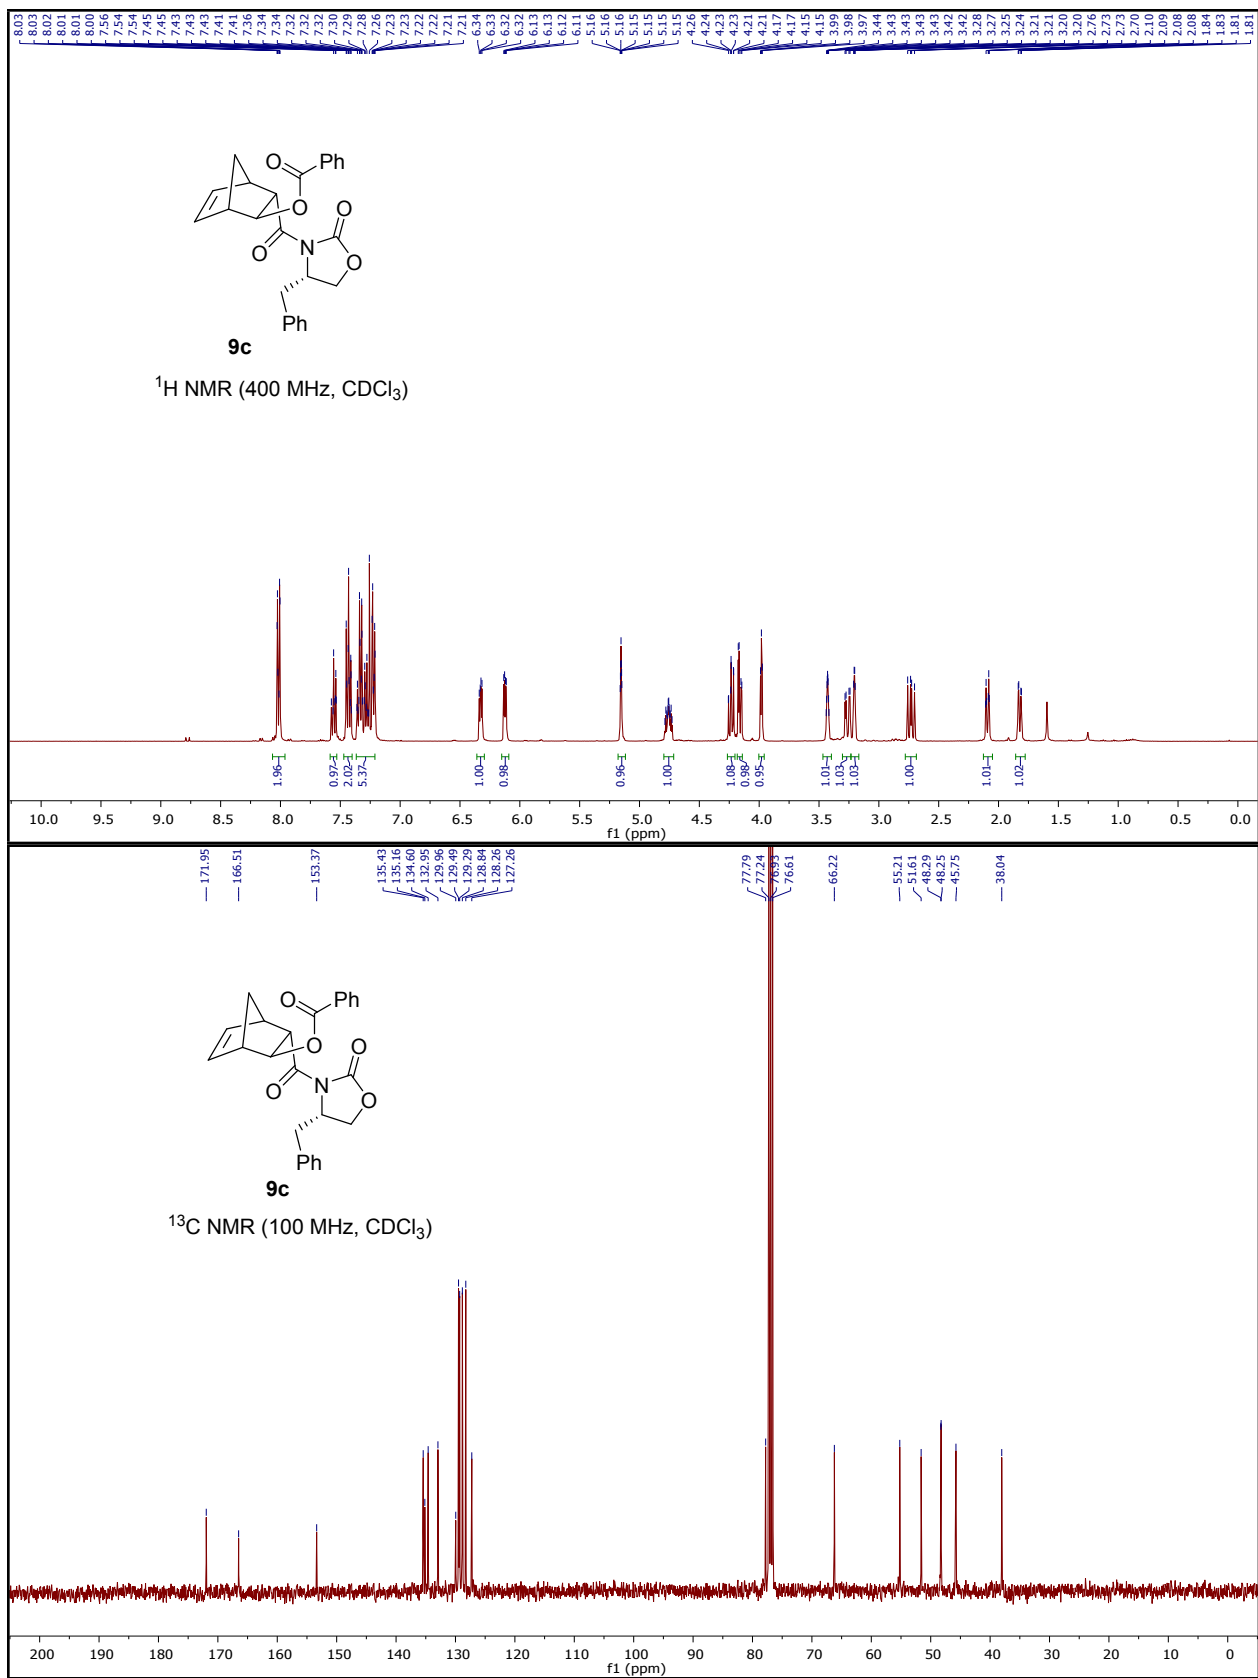

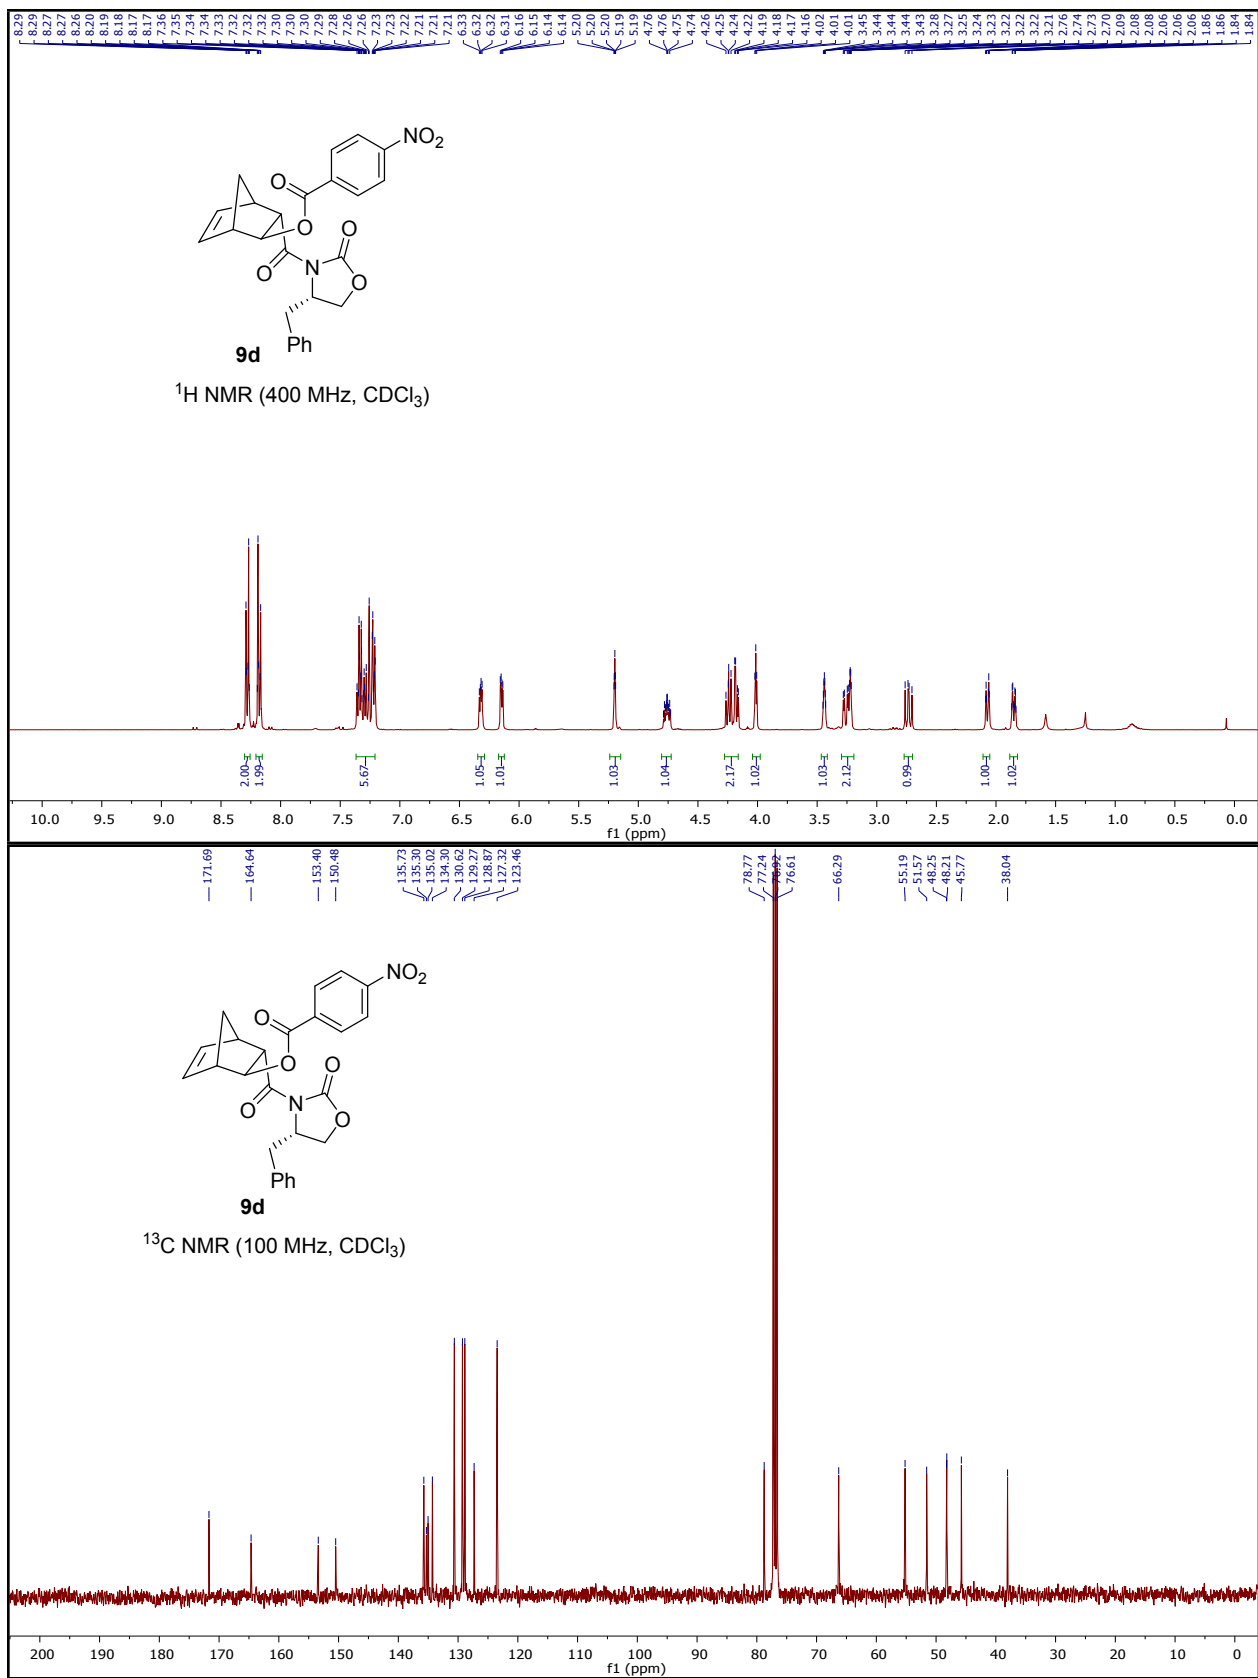

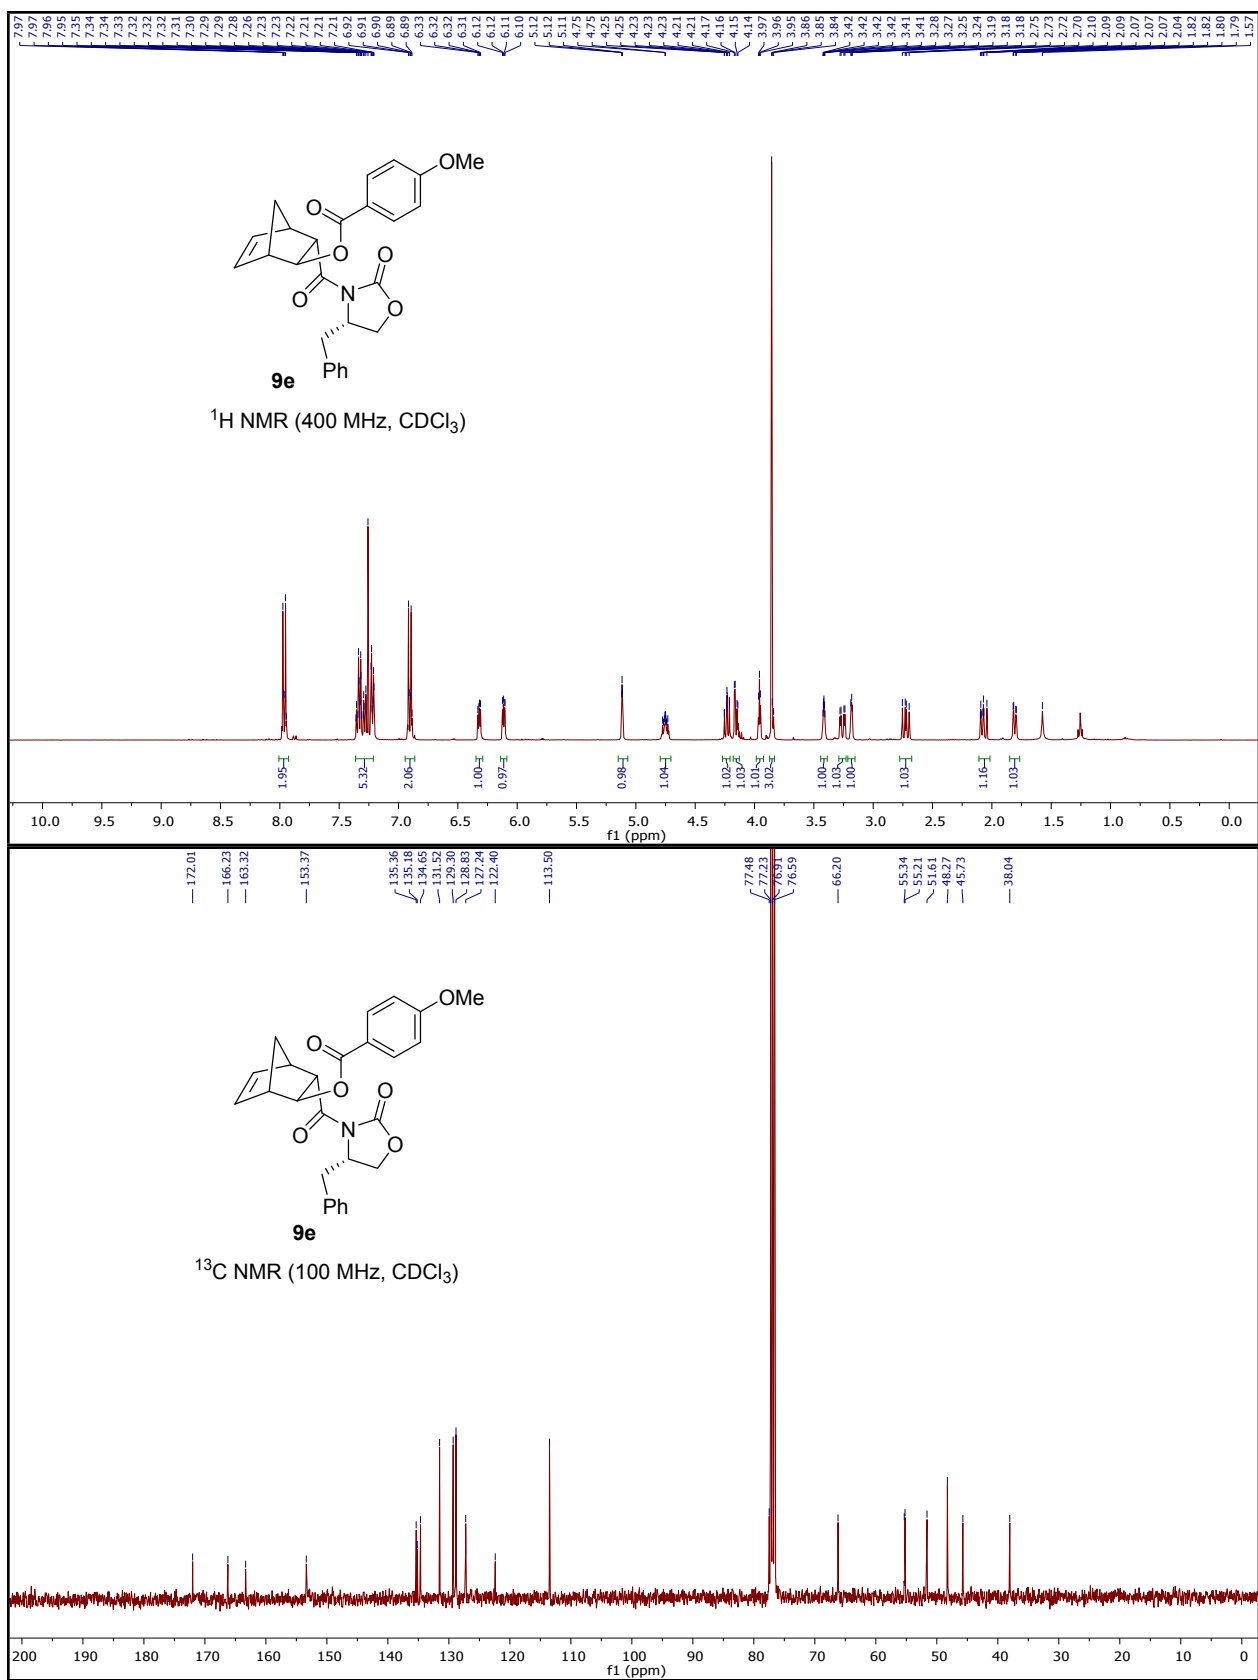

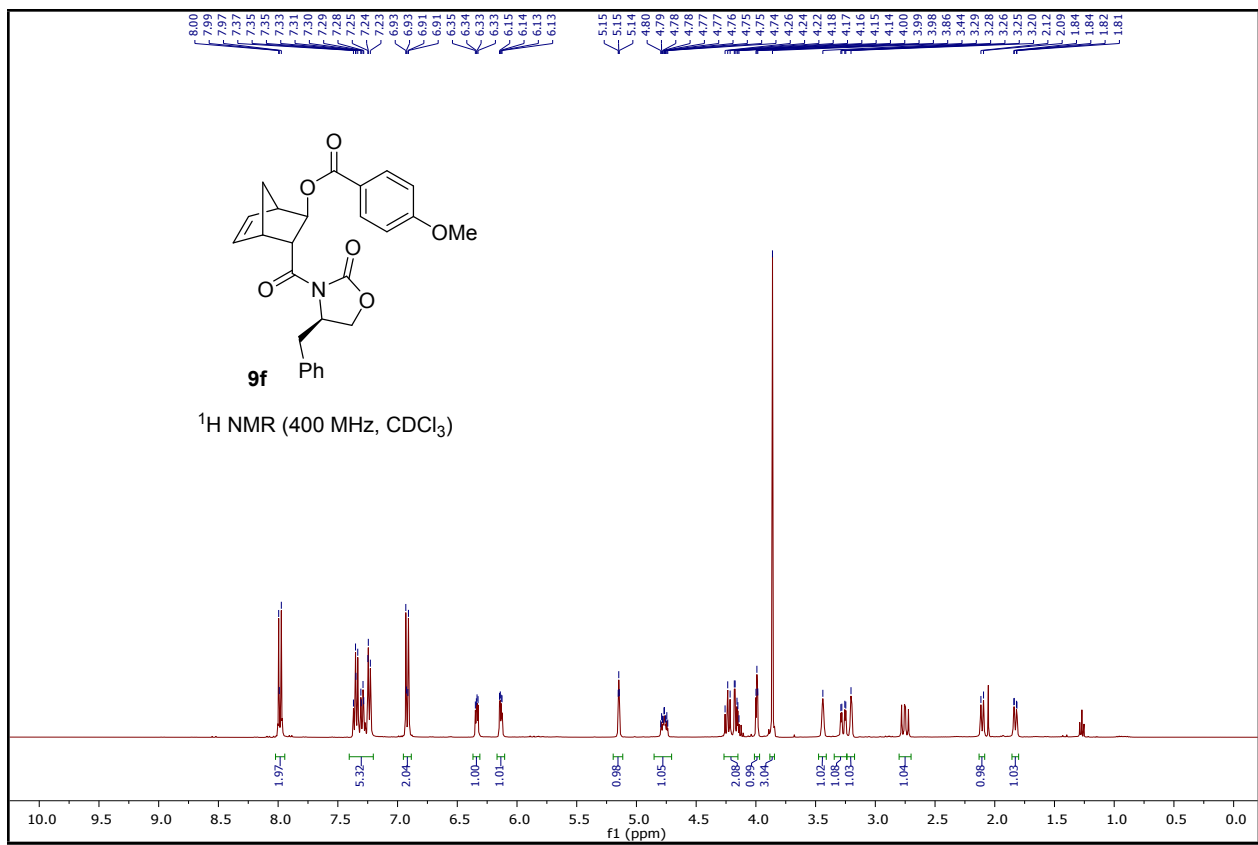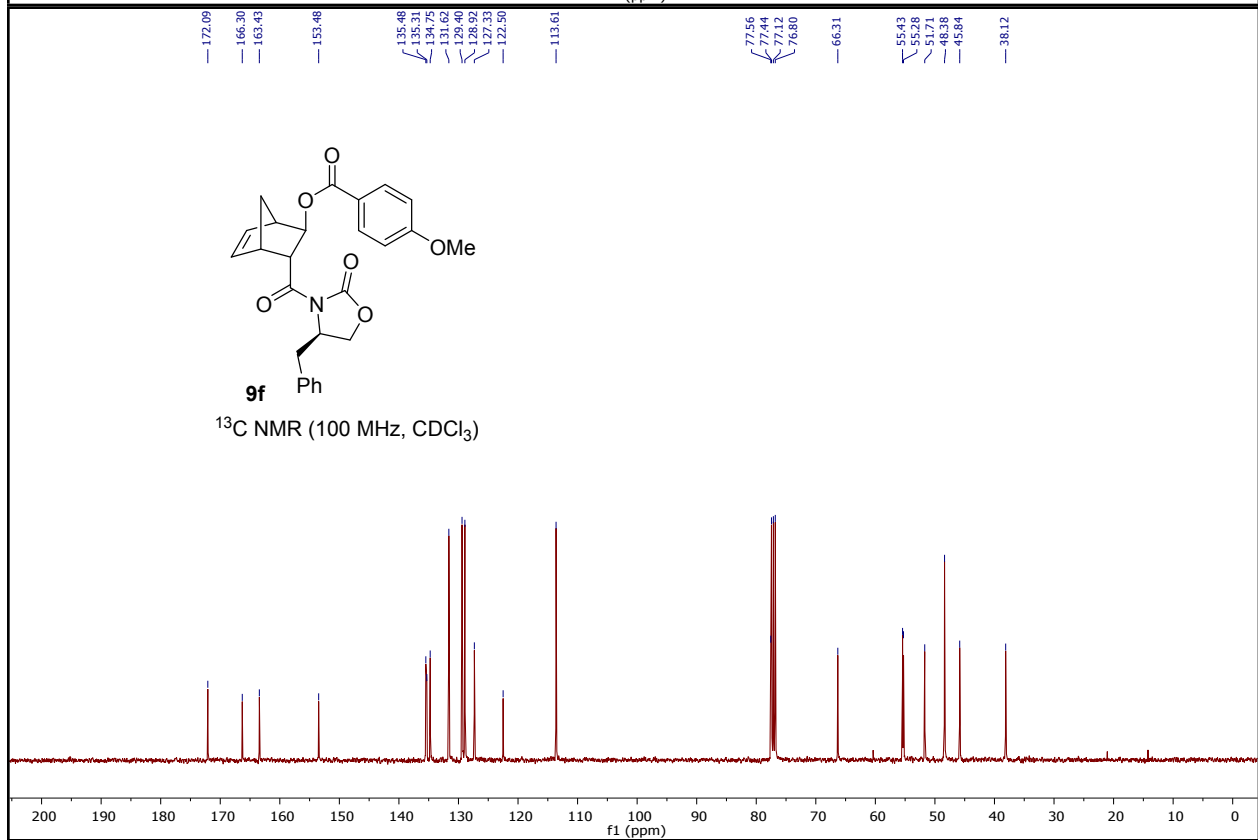

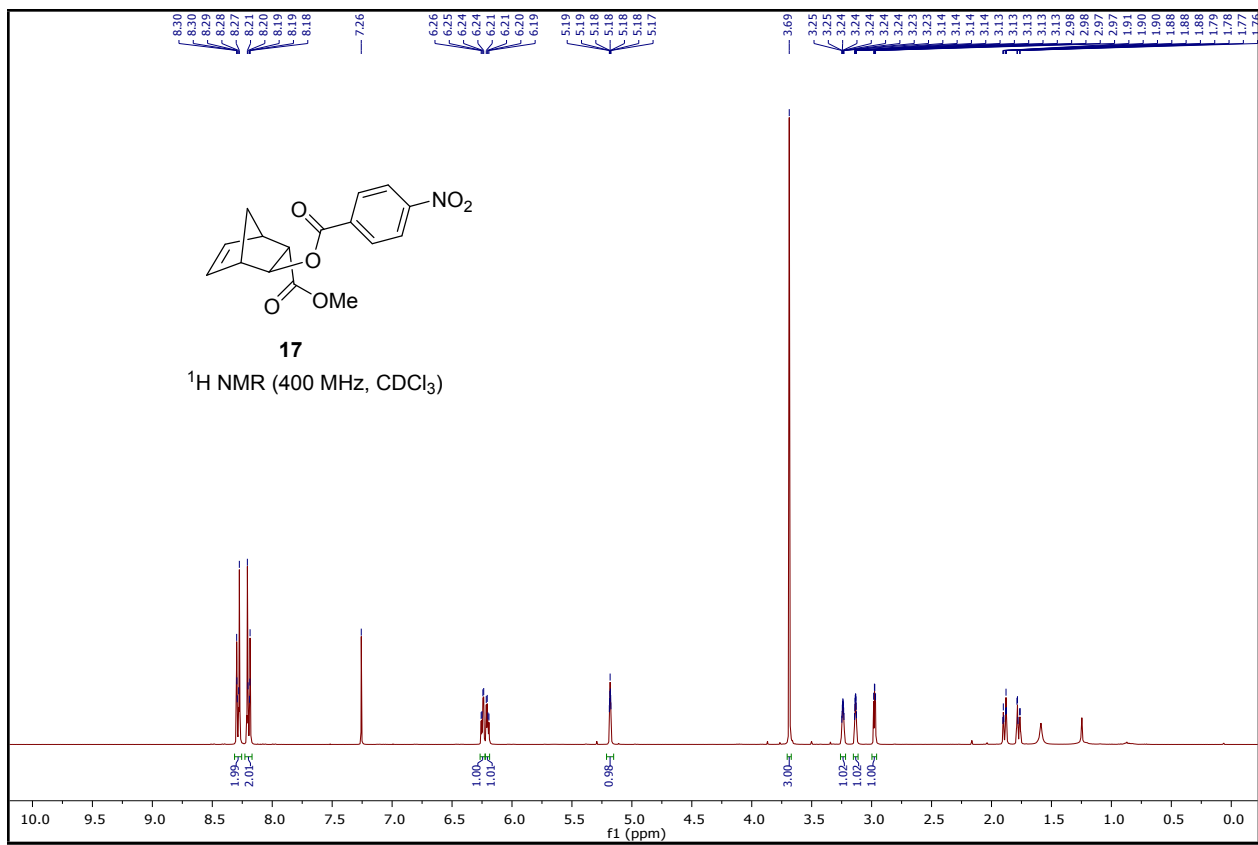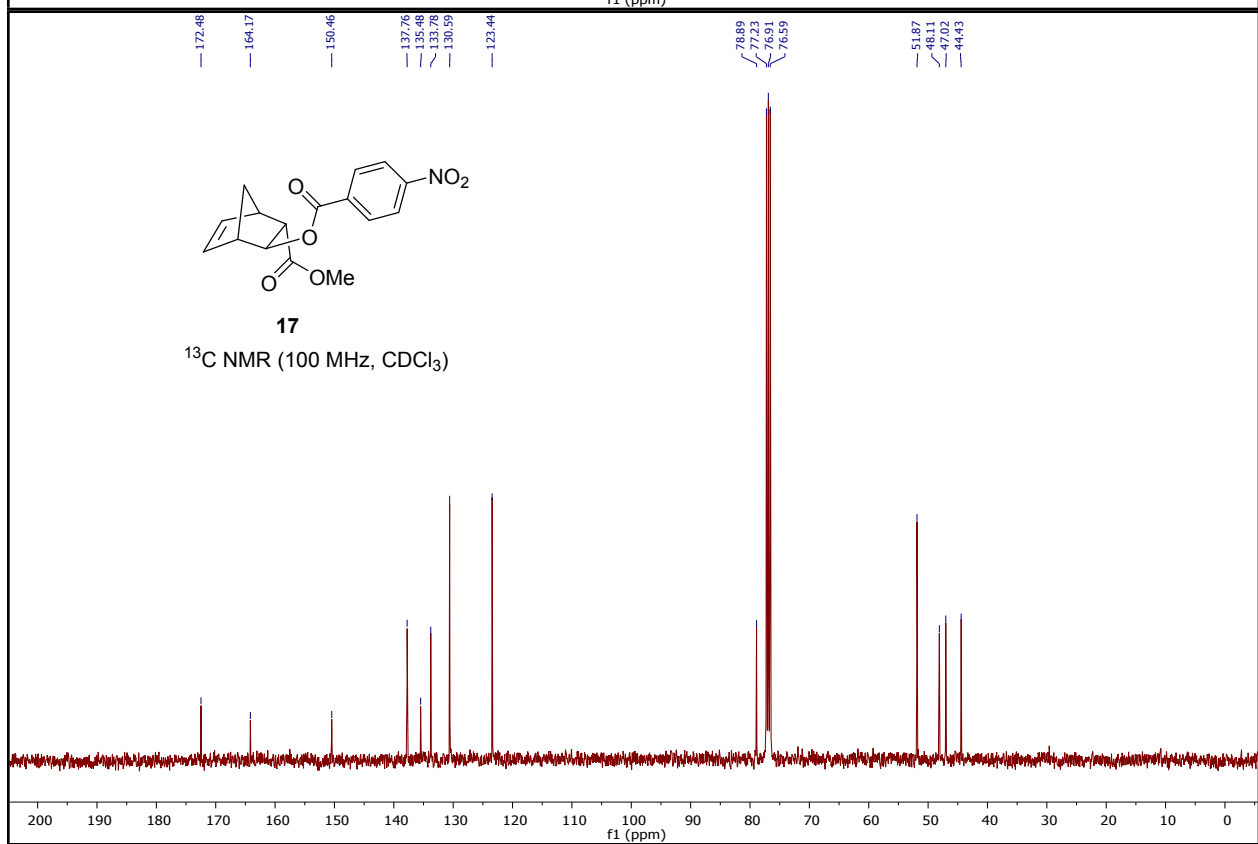

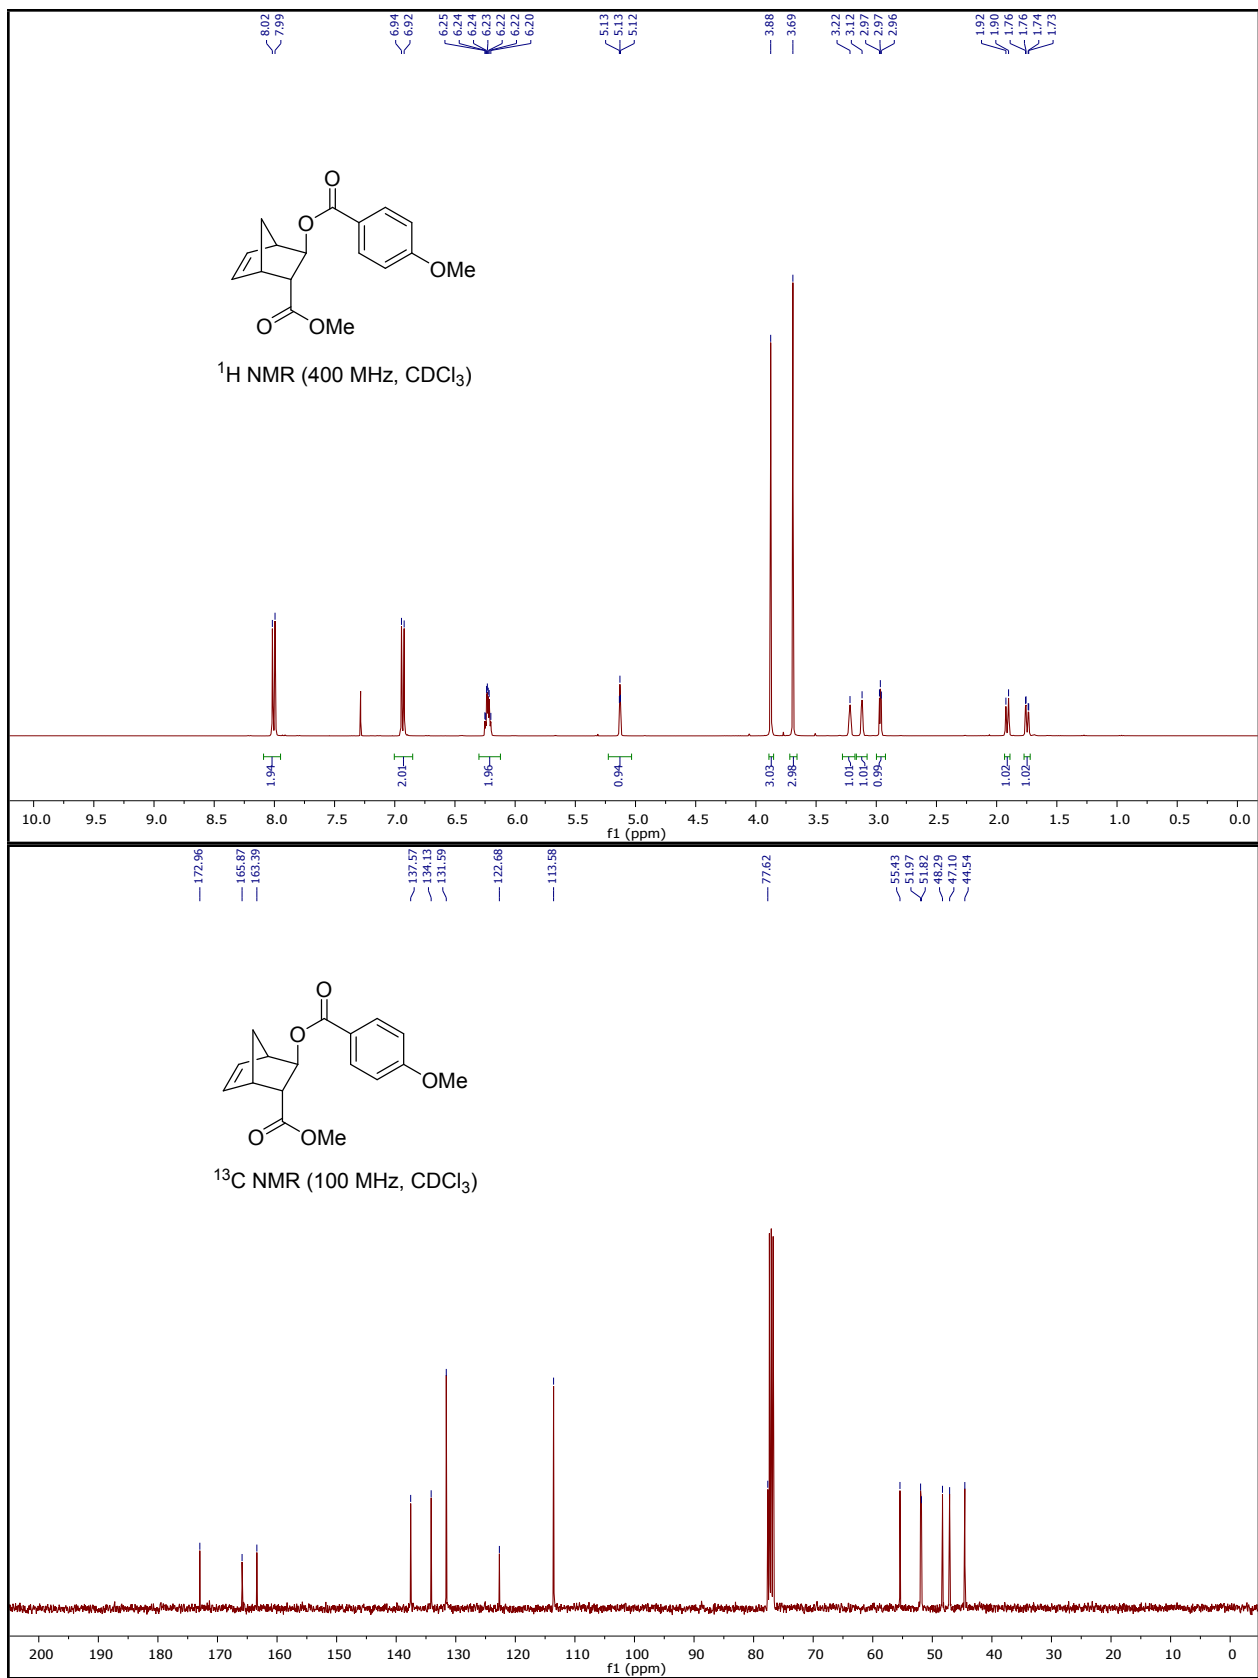



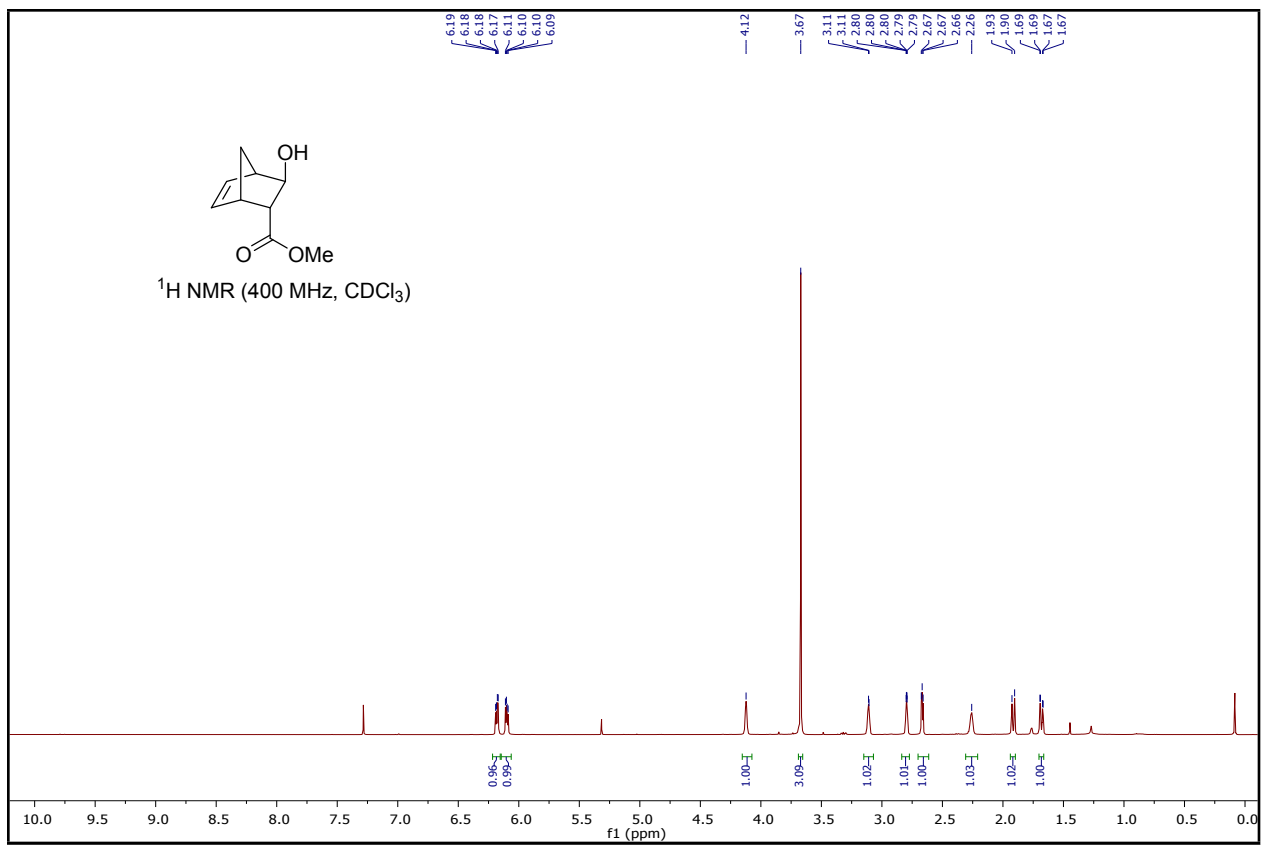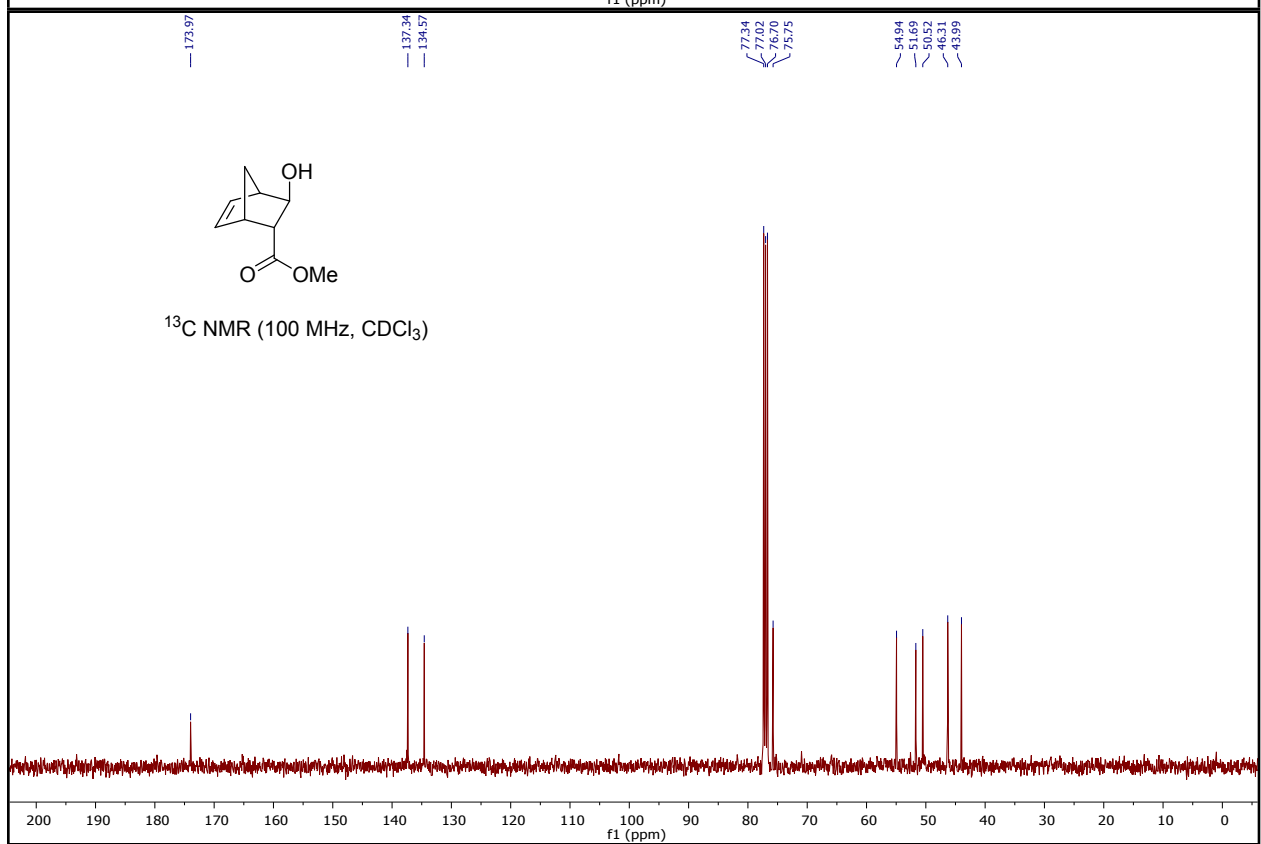

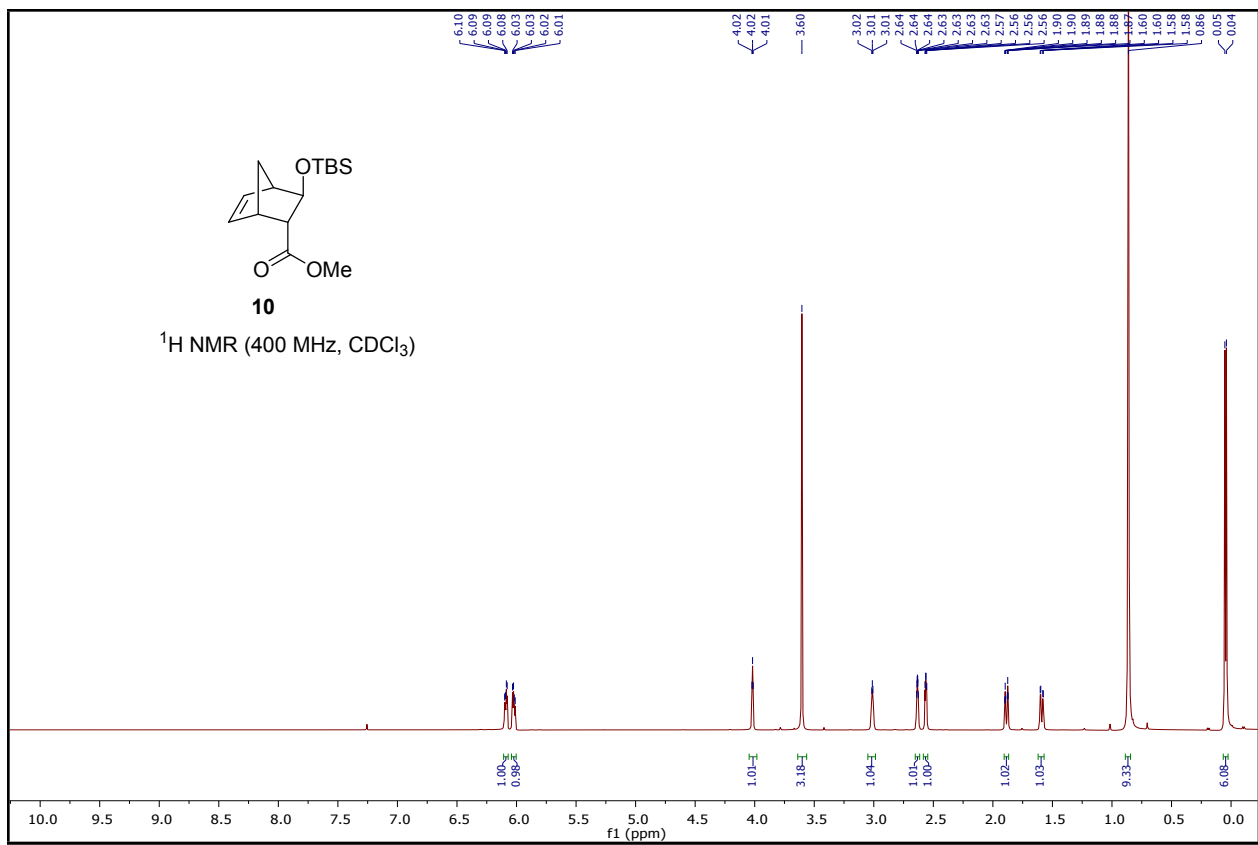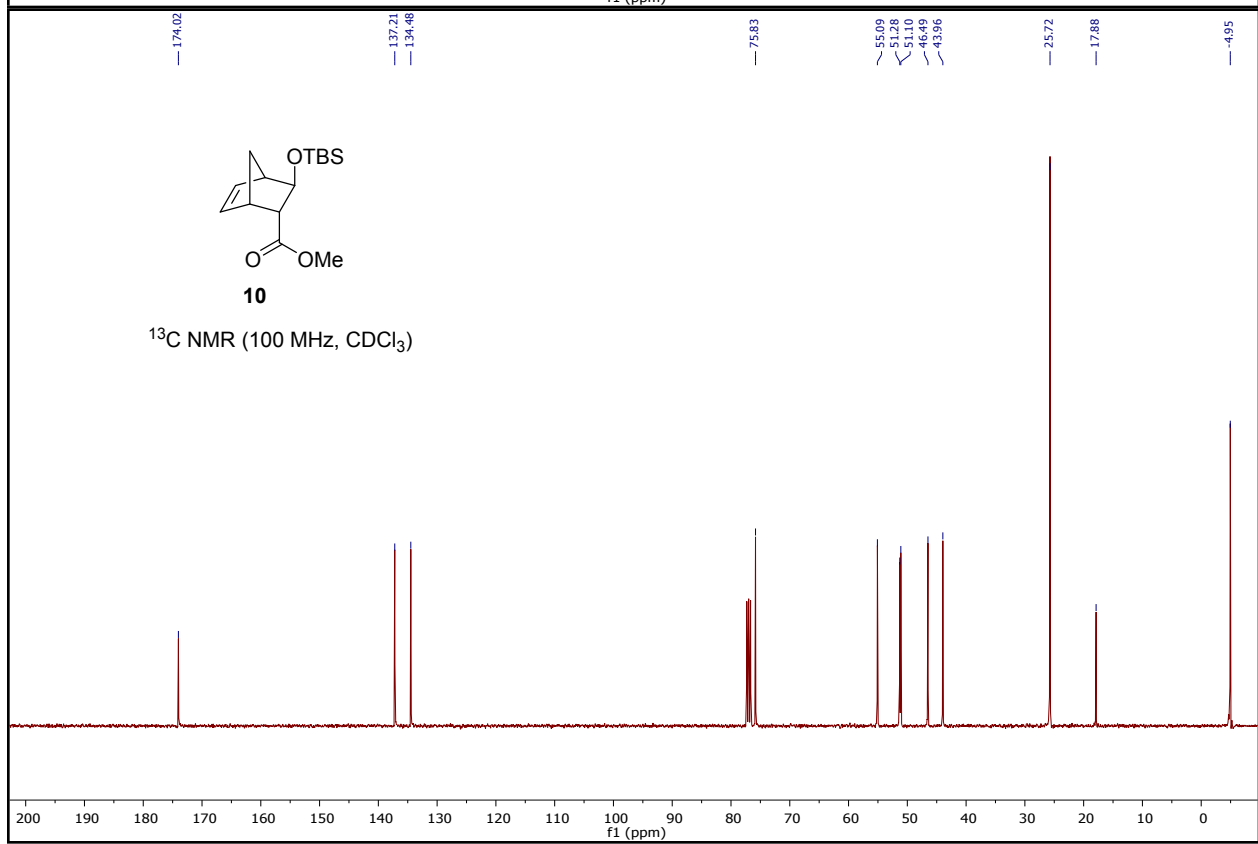

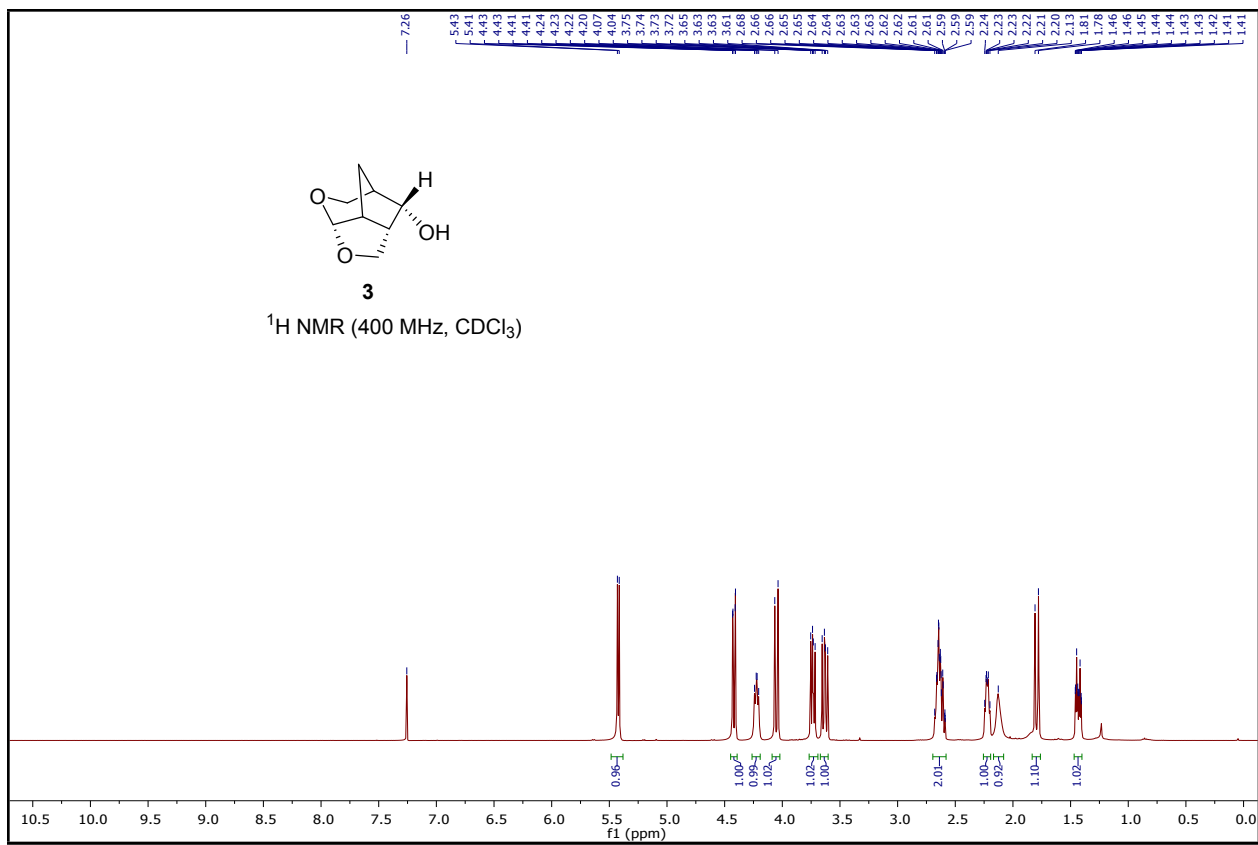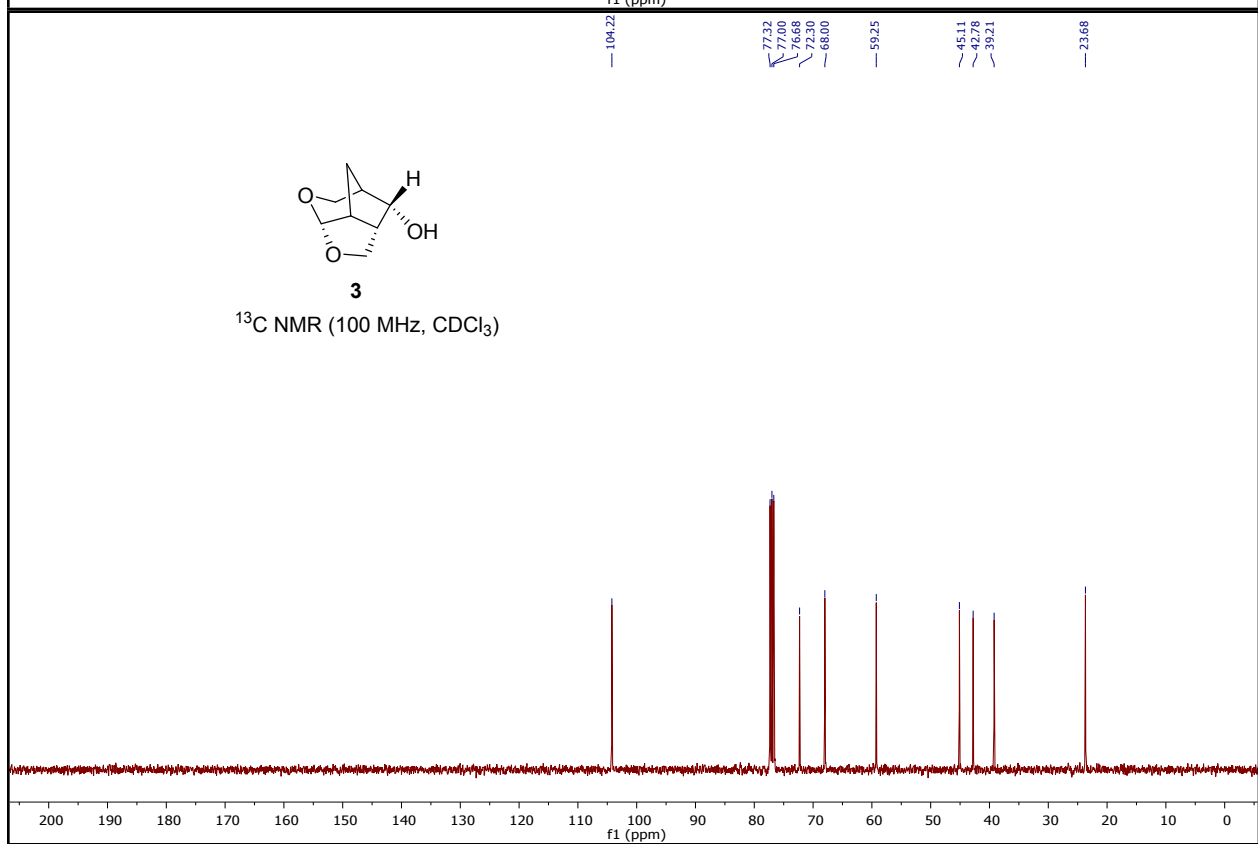

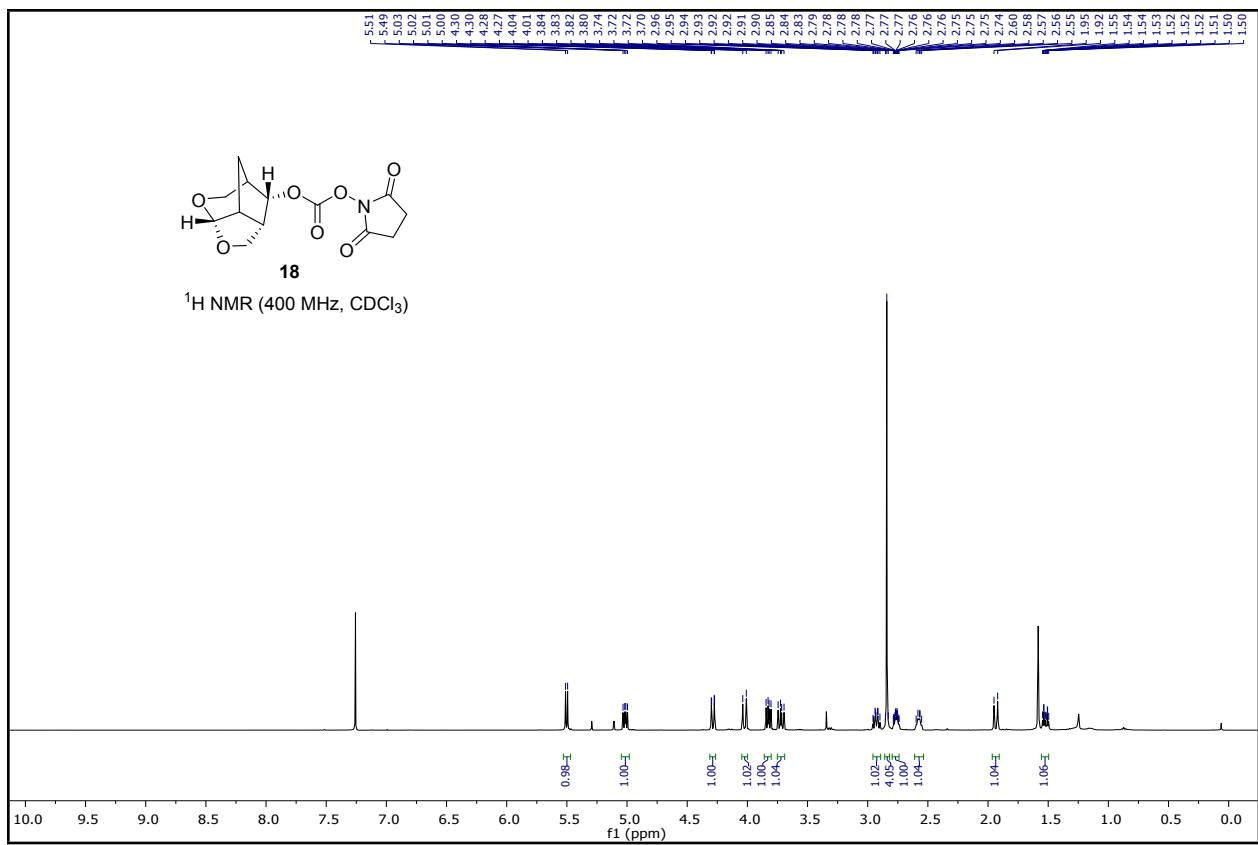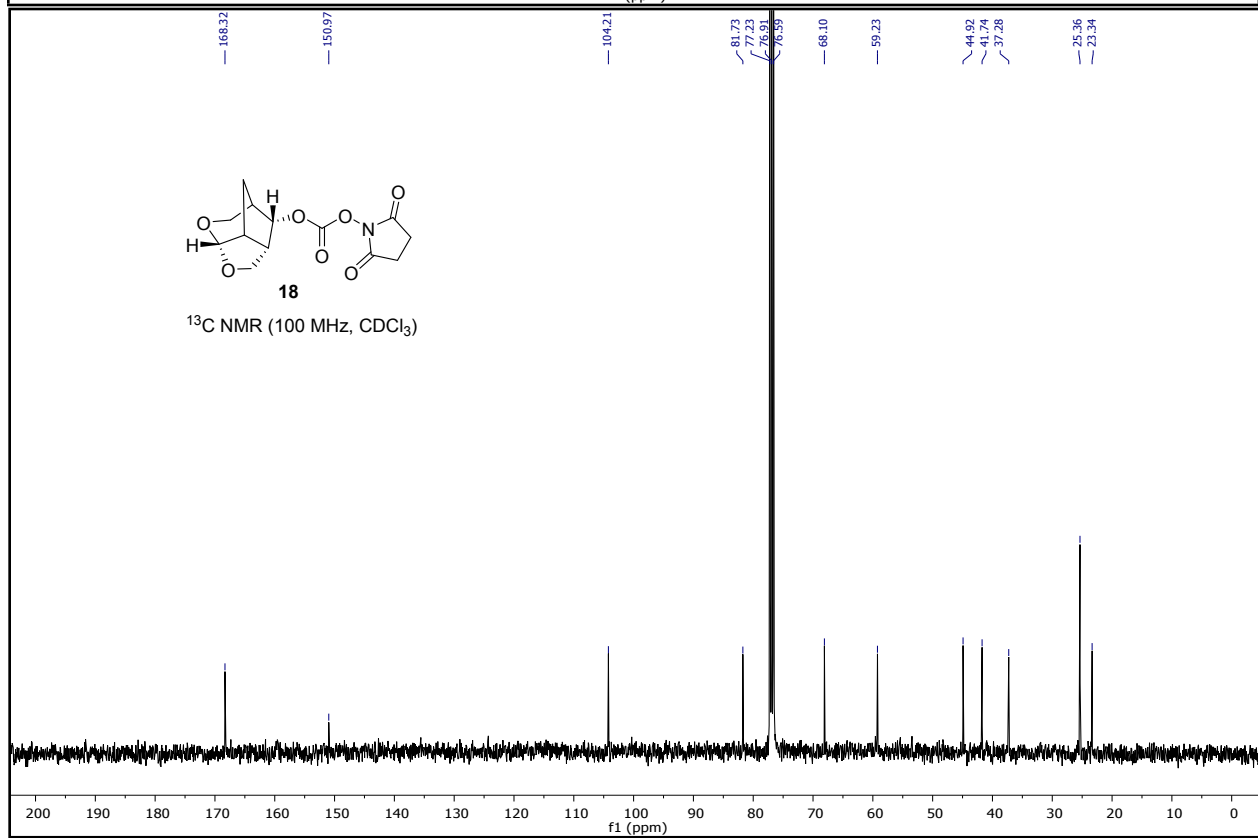

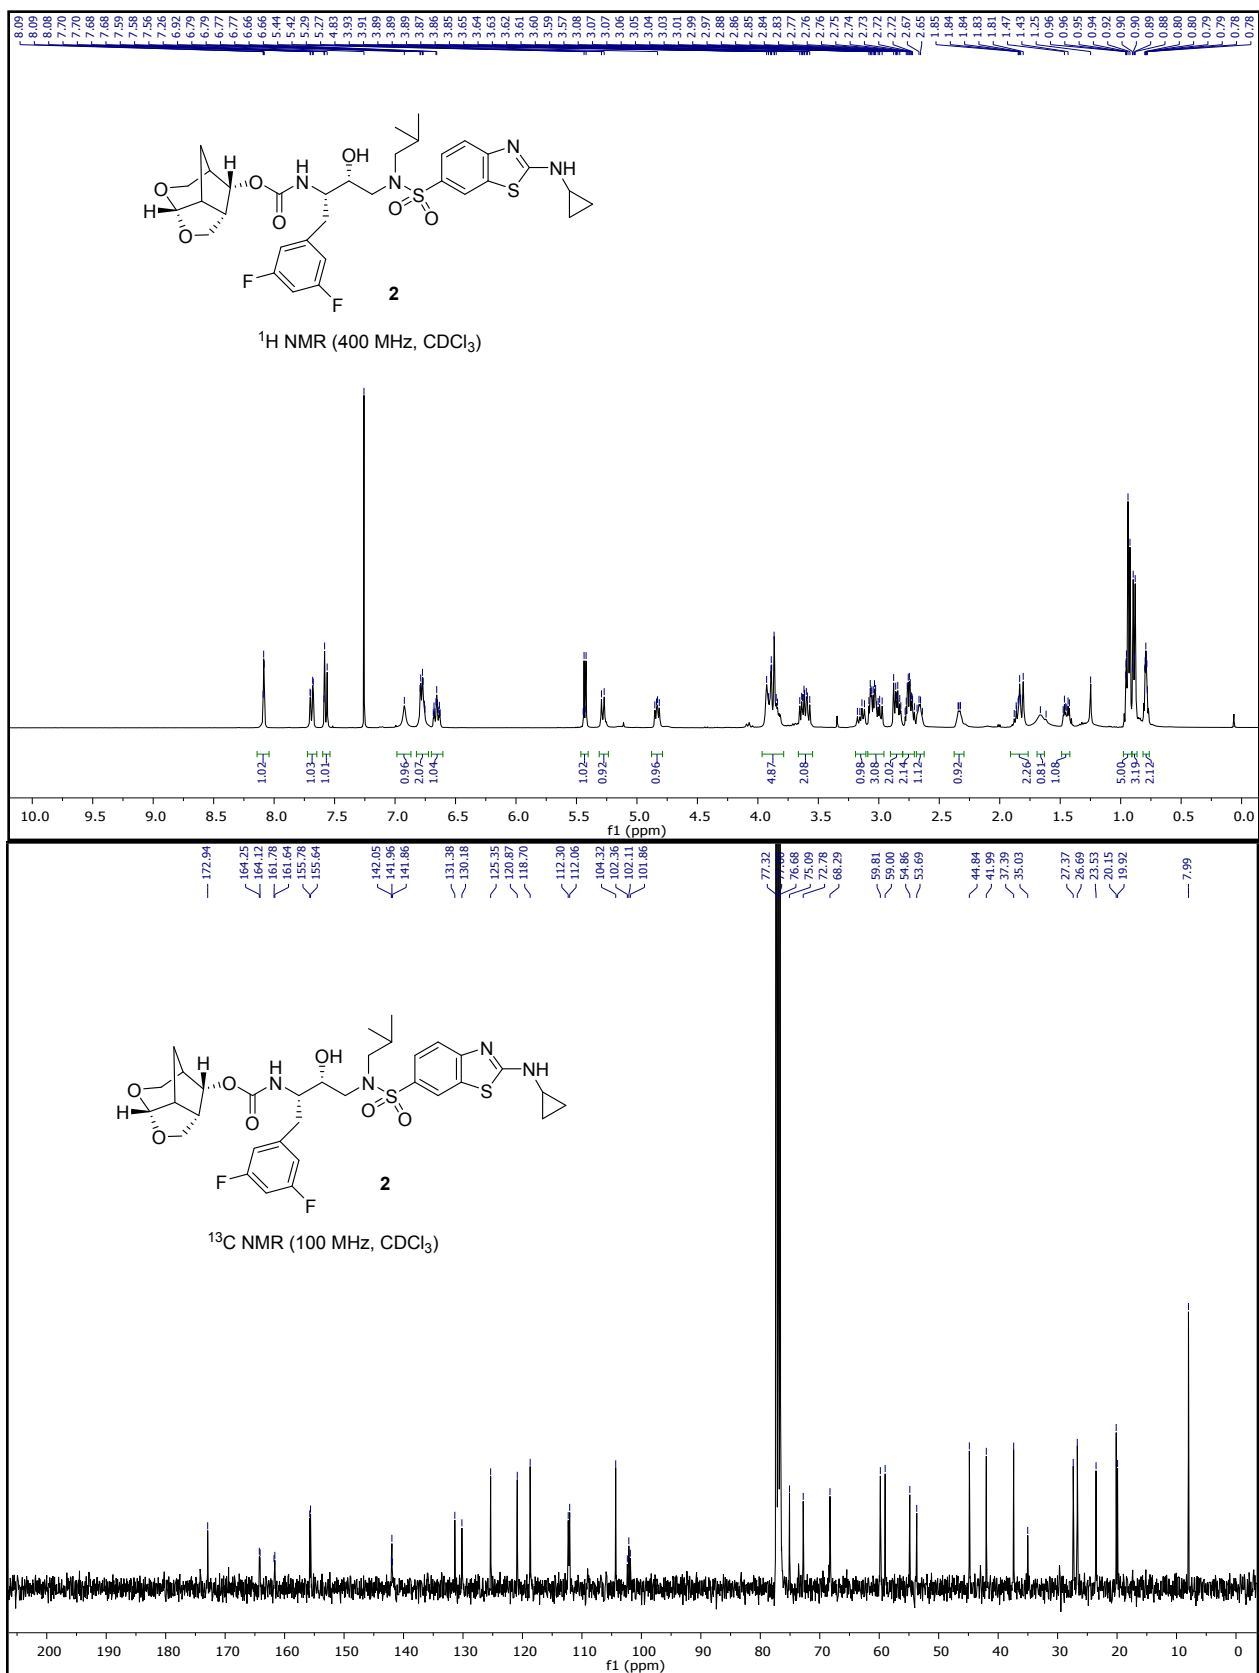

Supplement: c9ra10178k1.pdf [file c9ra10178k1.pdf]
